# Supplementary material for: Identification of Novel and Potent Indole-Based Benzenesulfonamides as Selective Human Carbonic Anhydrase II Inhibitors: Design, Synthesis, In Vitro, and In Silico Studies
Source: MDPI journal article supplement (doi:10.3390/ijms23052540), 2022-02-25

# **Supplementary material**

## **Identification of Novel and Potent Indole-based Benzenesulfonamides as Selective Human Carbonic Anhydrase II Inhibitors: Design, Synthesis, In Vitro, and In Silico Studies**

### **Contents**

- 1.  $^1\text{H}$ NMR and  $^{13}\text{C}$ NMR data of compounds (**2a-2o**)**
- 2. HPLC purity**
- 3. HRMS data**
- 4. HRMS interpretation**

WGU-I-74  
399,81  
dmsol

Nc1ccc(NC(=O)CCc2c[nH]c3ccccc23)s(=O)(=O)c1

**2a**

11.5 10.5 9.5 9.0 8.5 8.0 7.5 7.0 6.5 6.0 5.5 5.0 4.5 4.0 3.5 3.0 2.5 2.0 1.5 1.0 0.5 0.0

f1 (ppm)

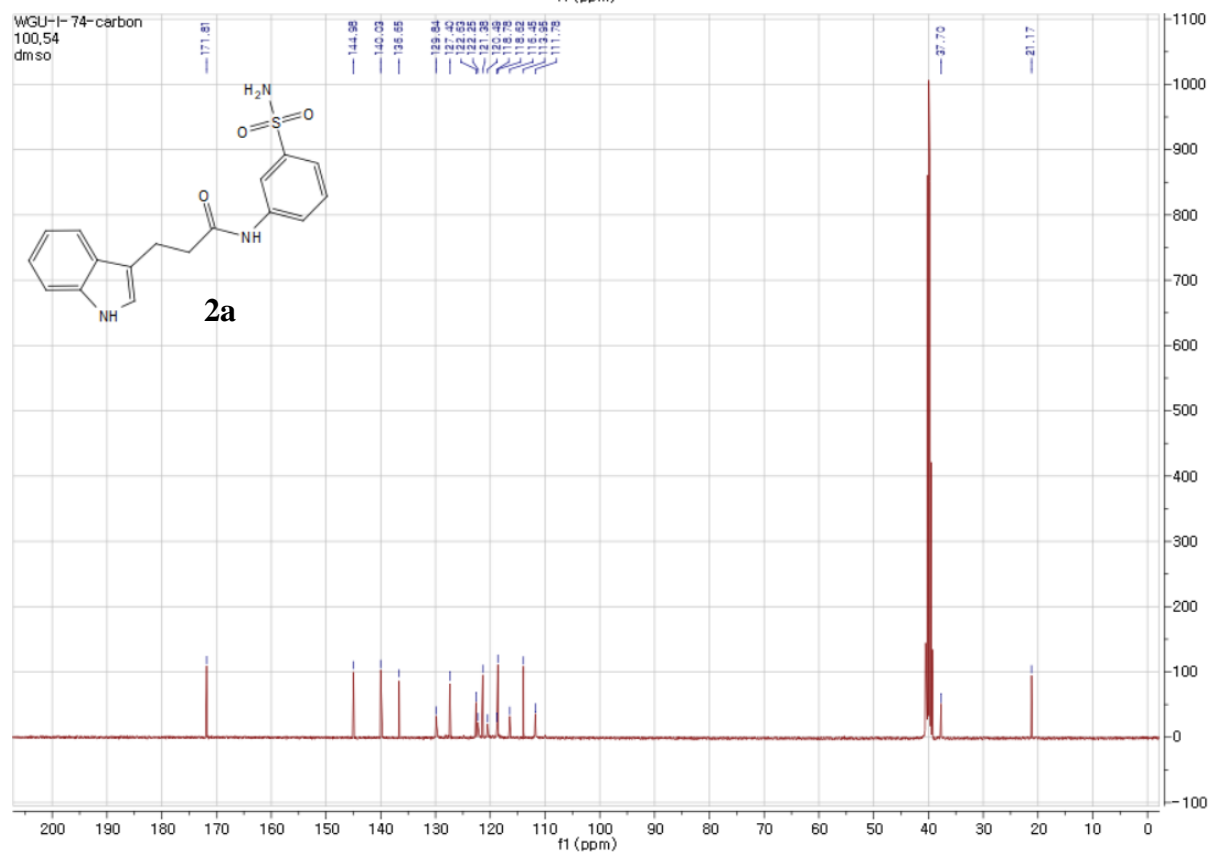



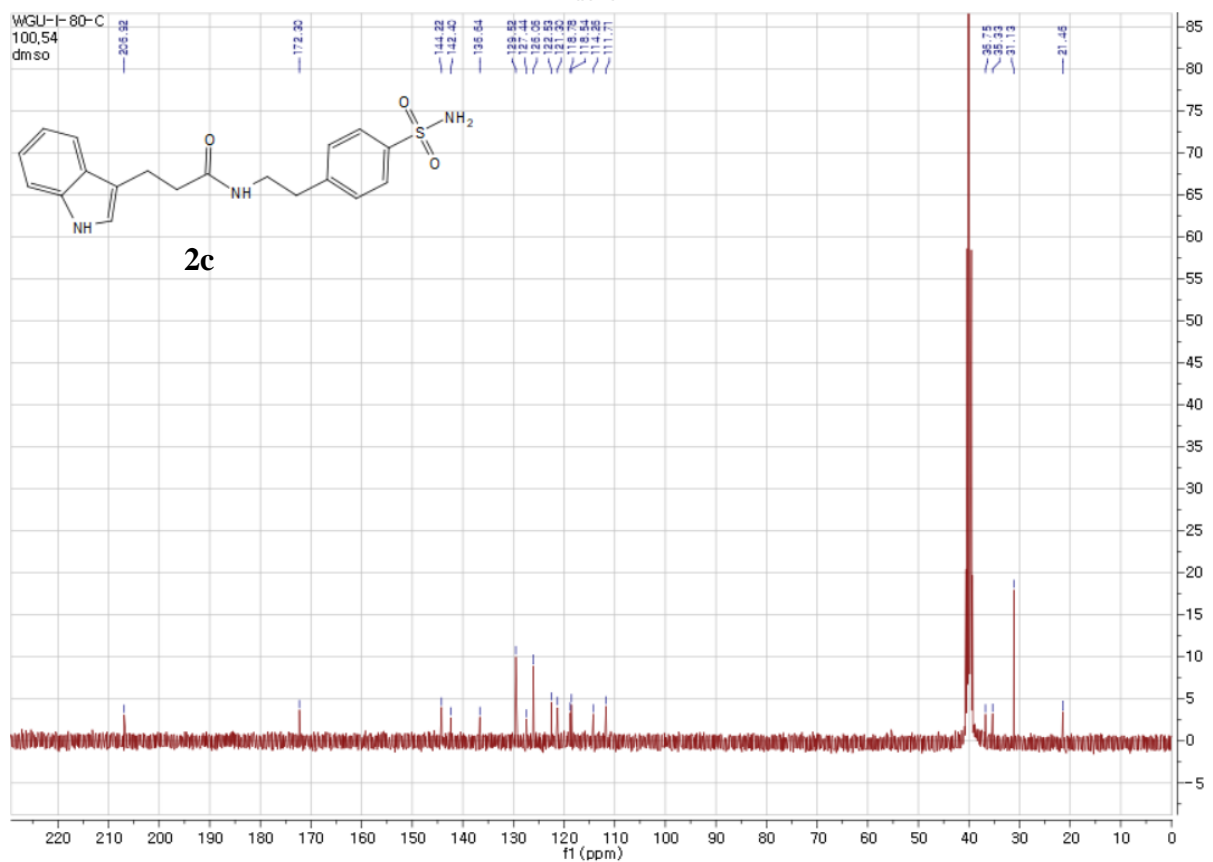

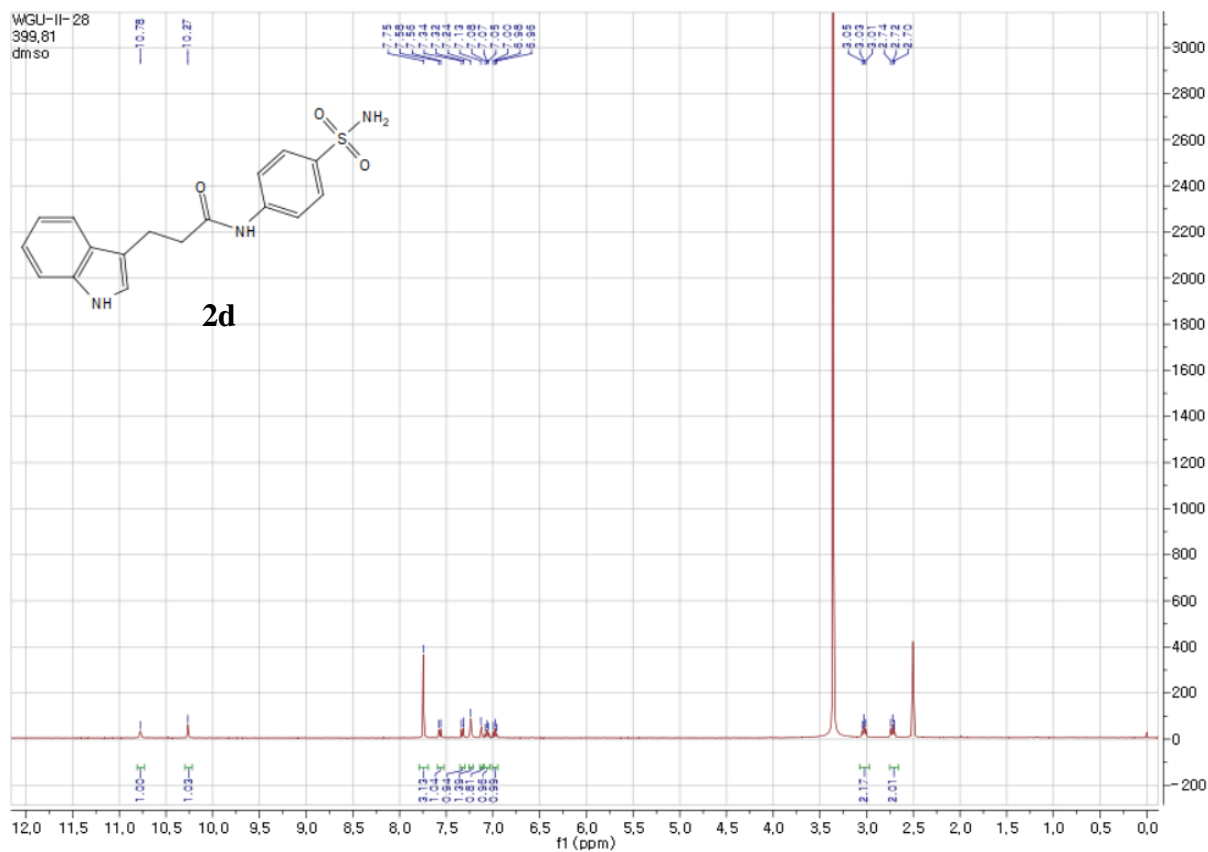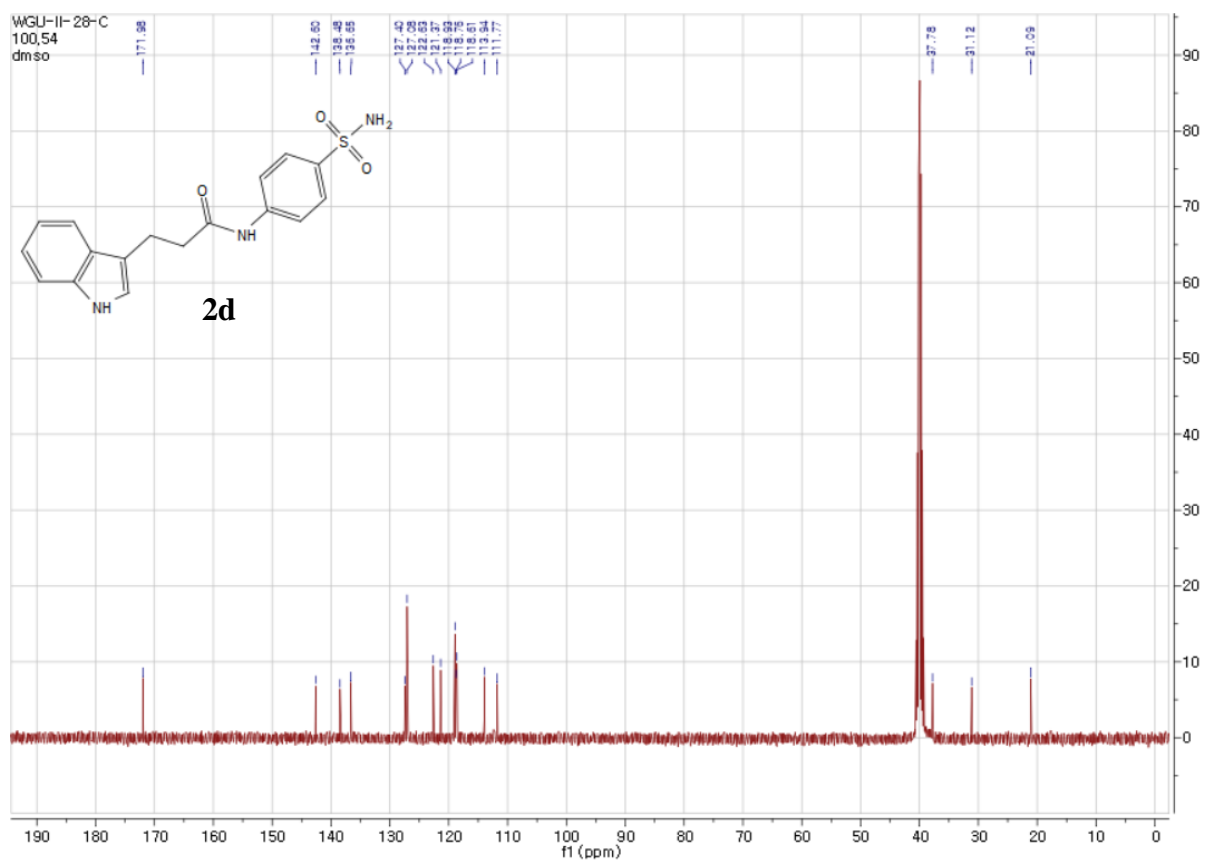

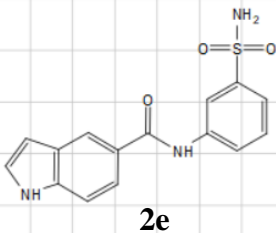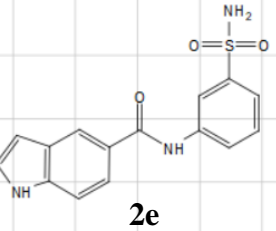

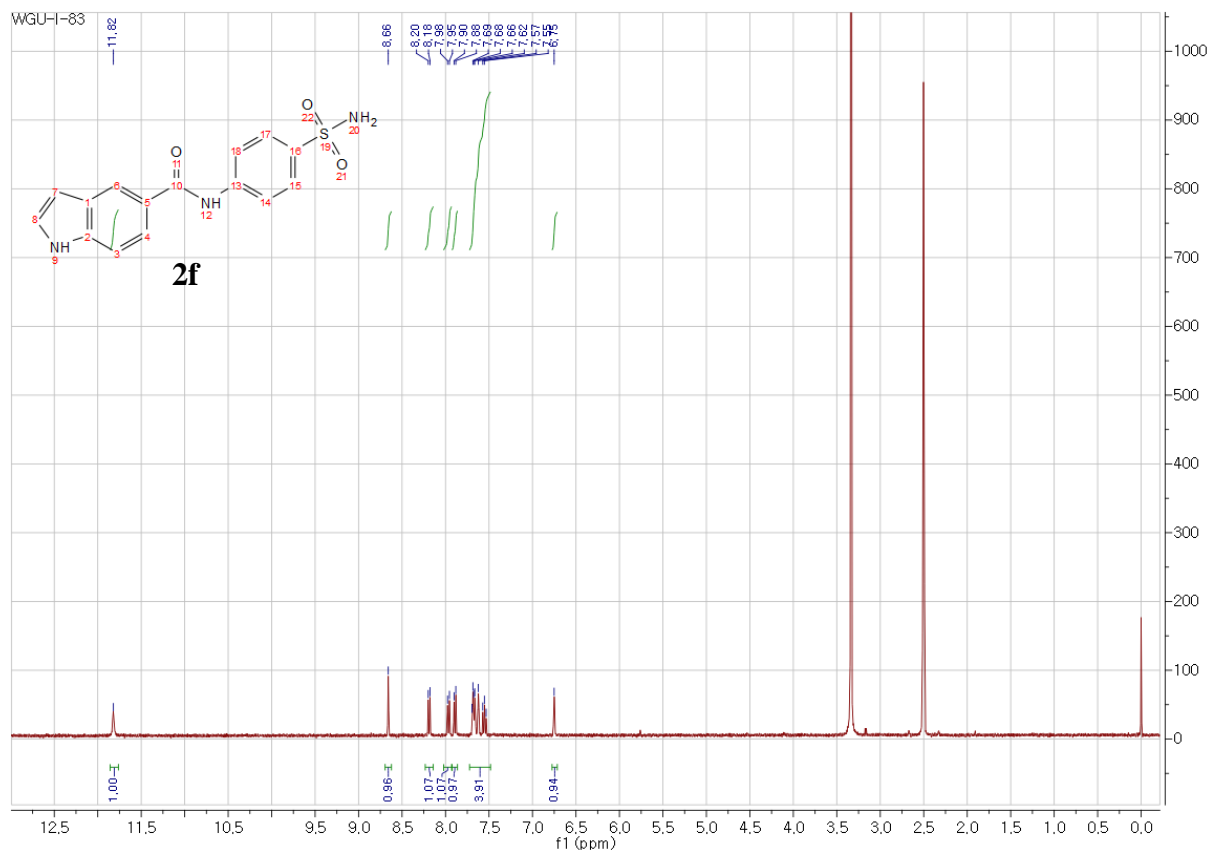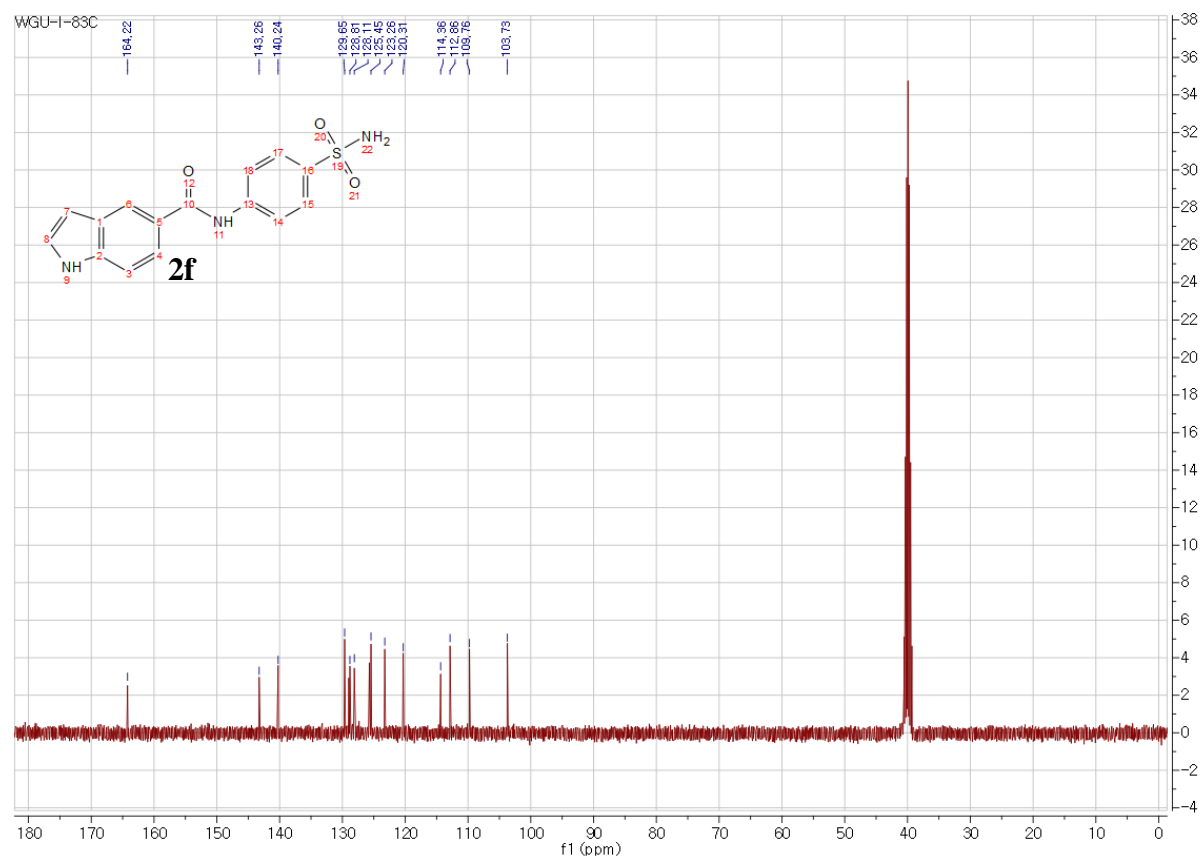





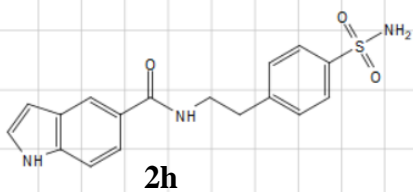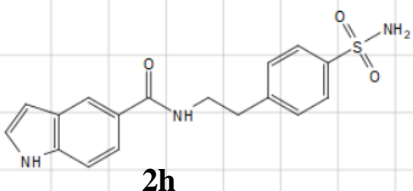

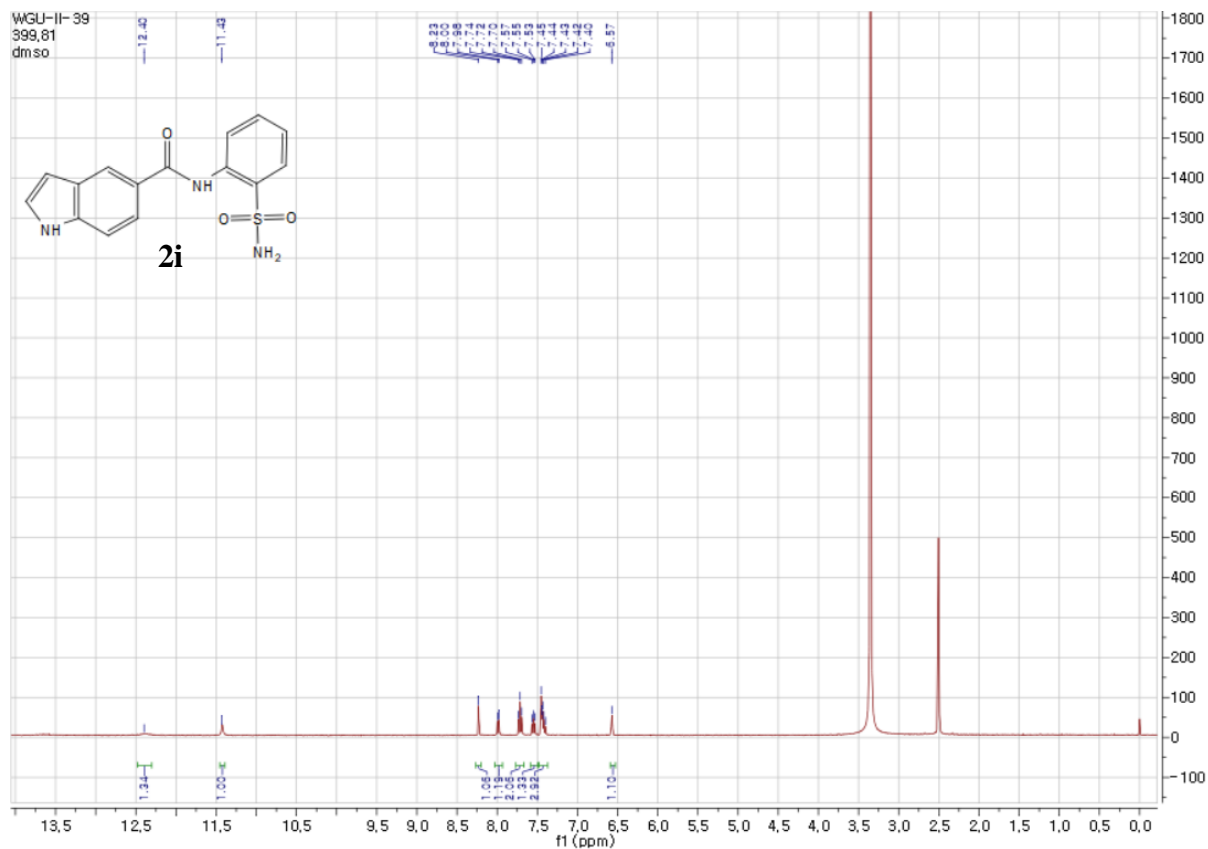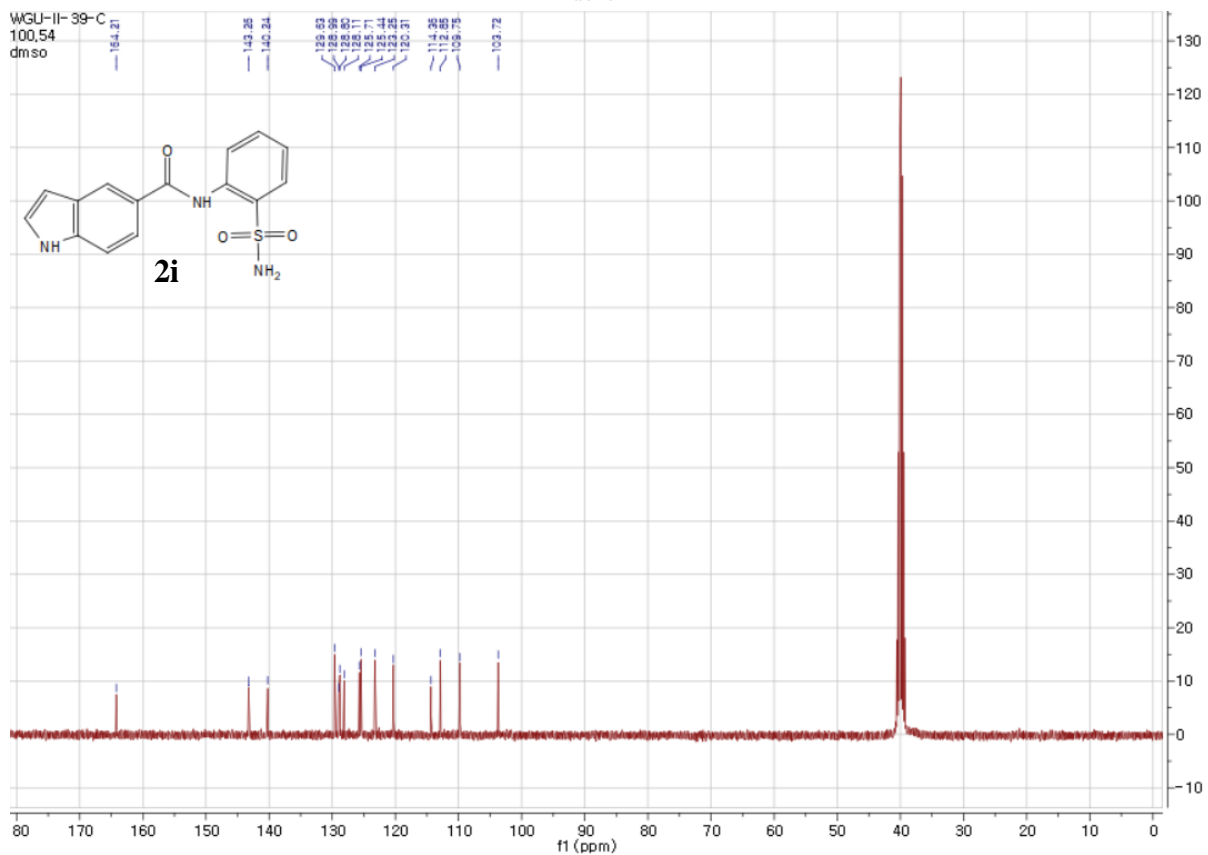

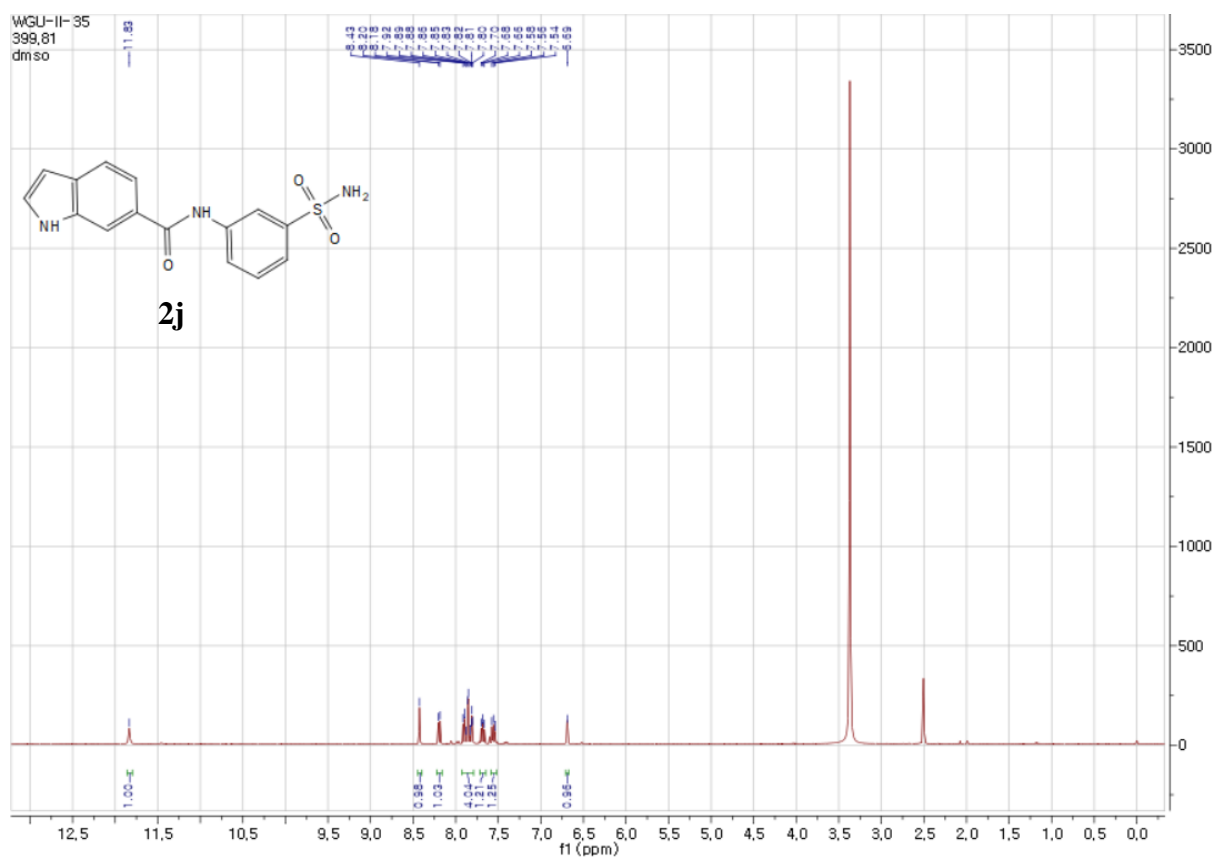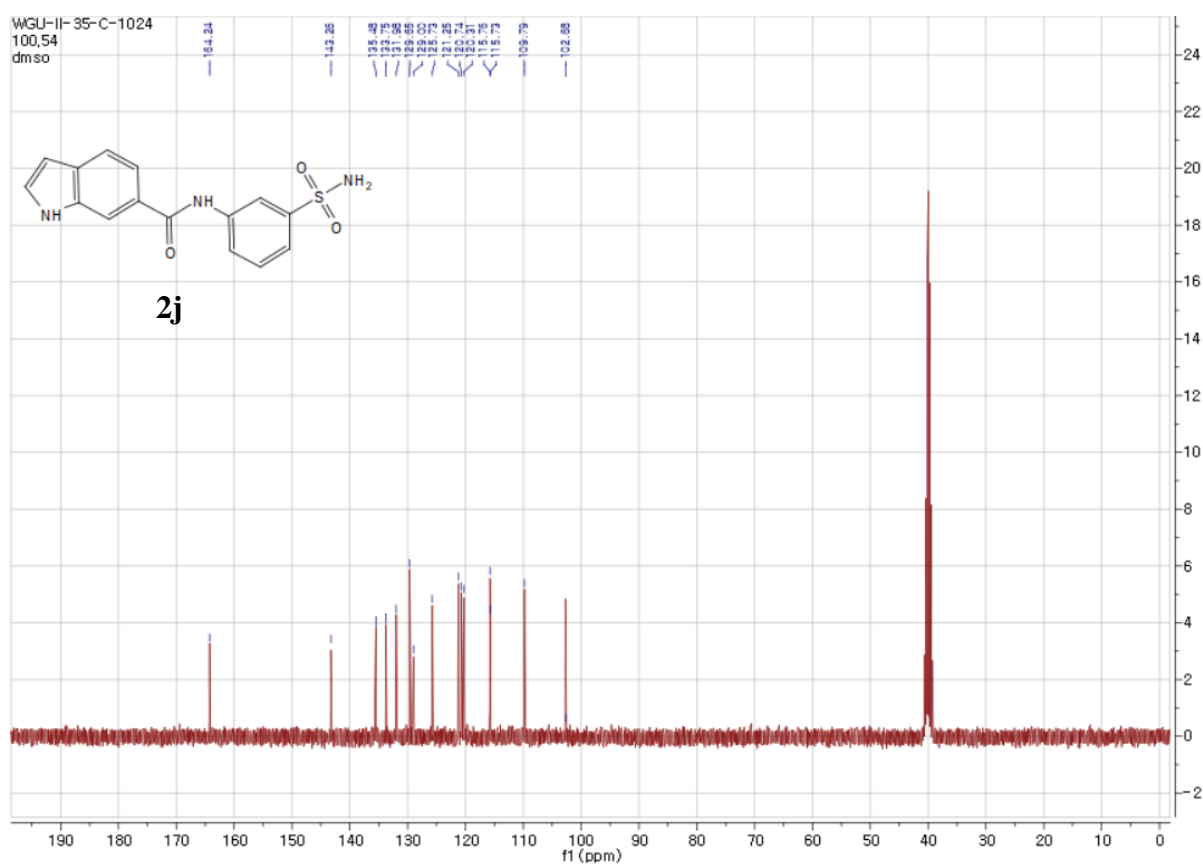

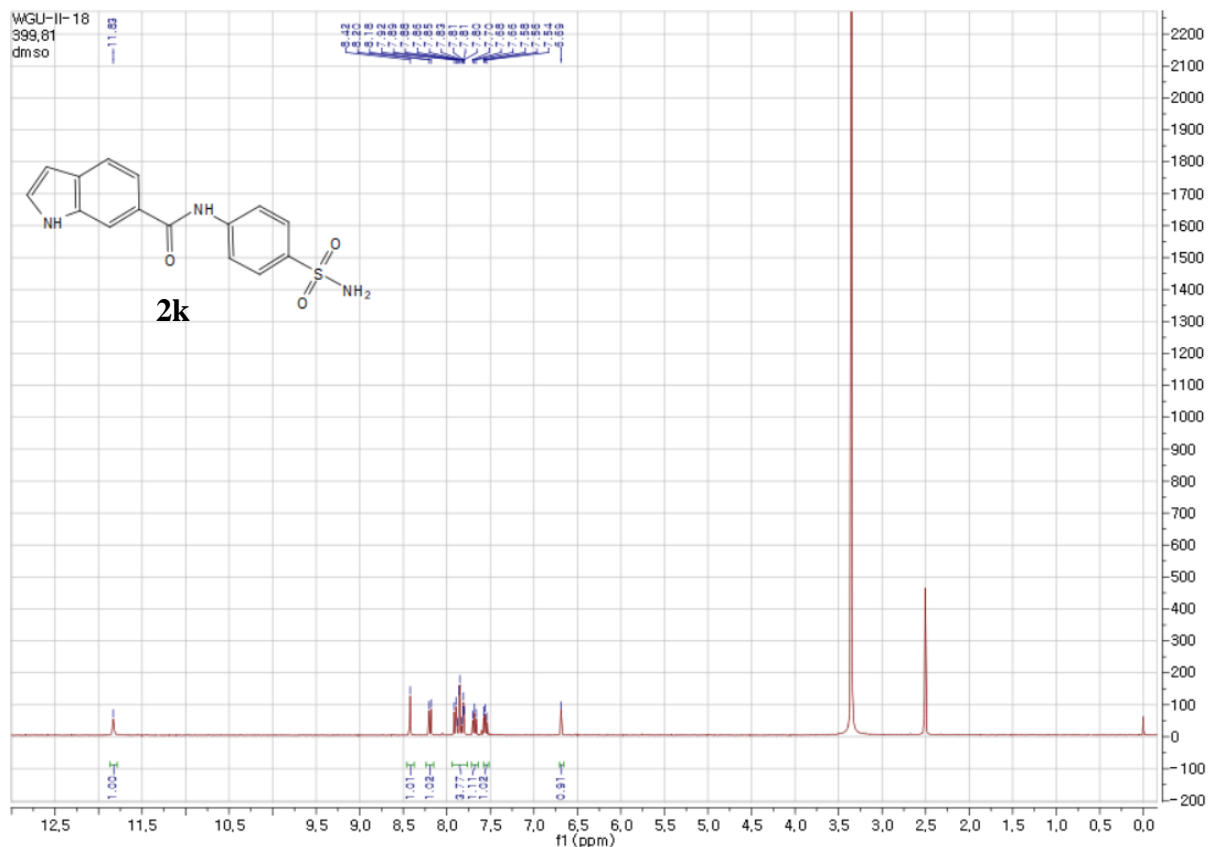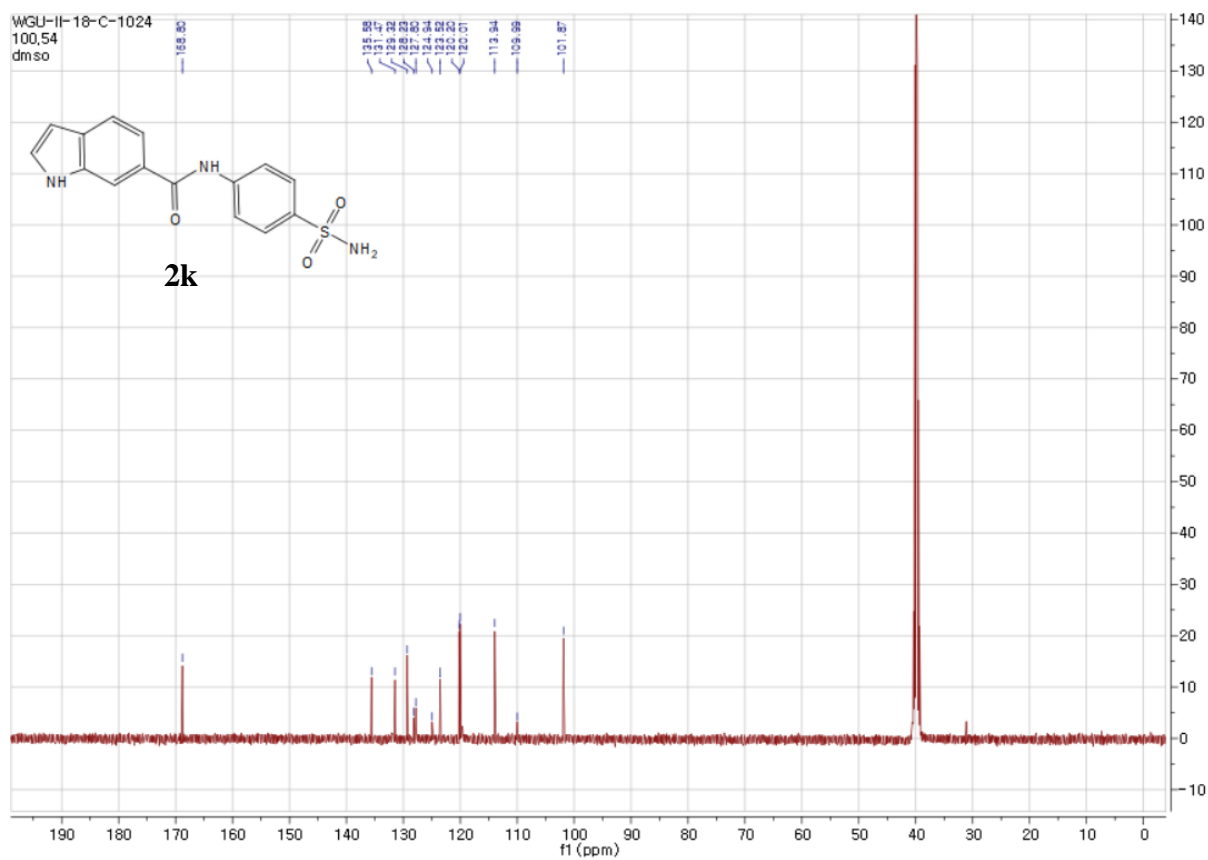

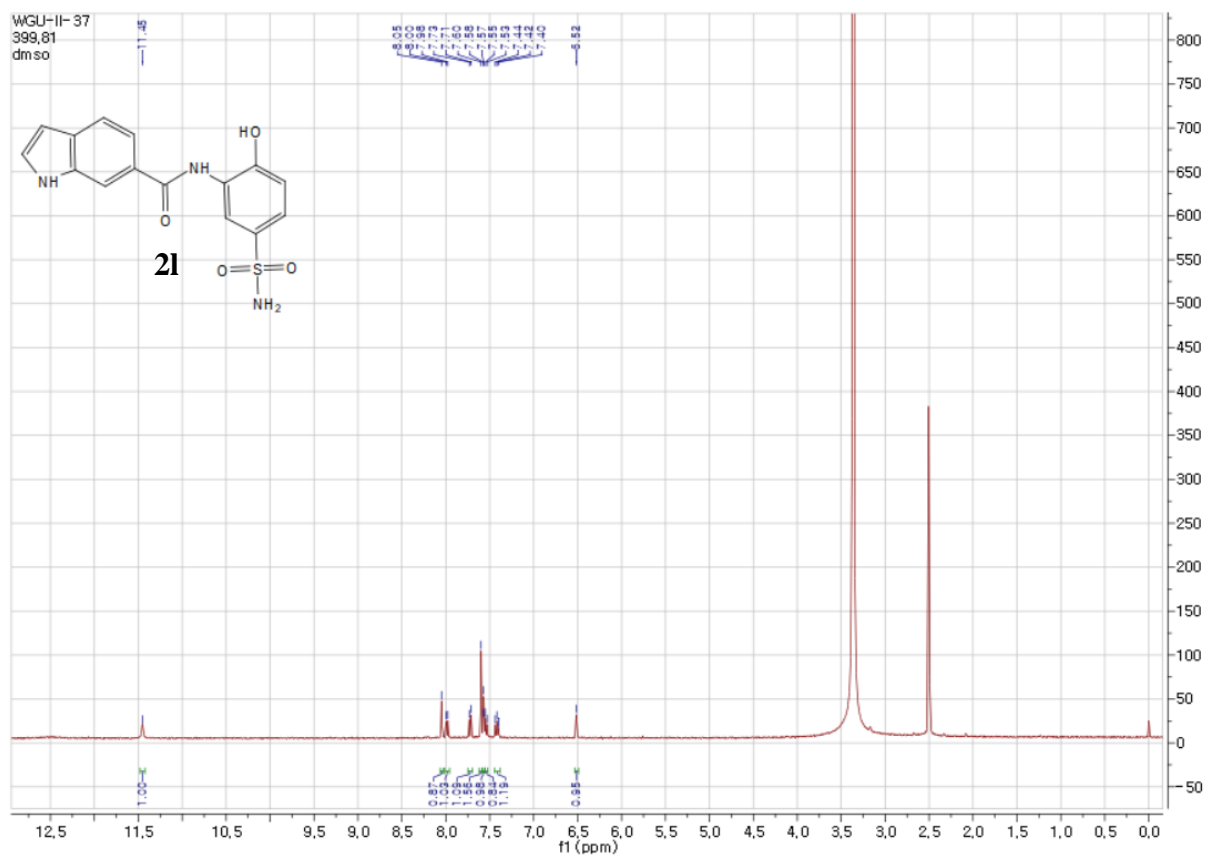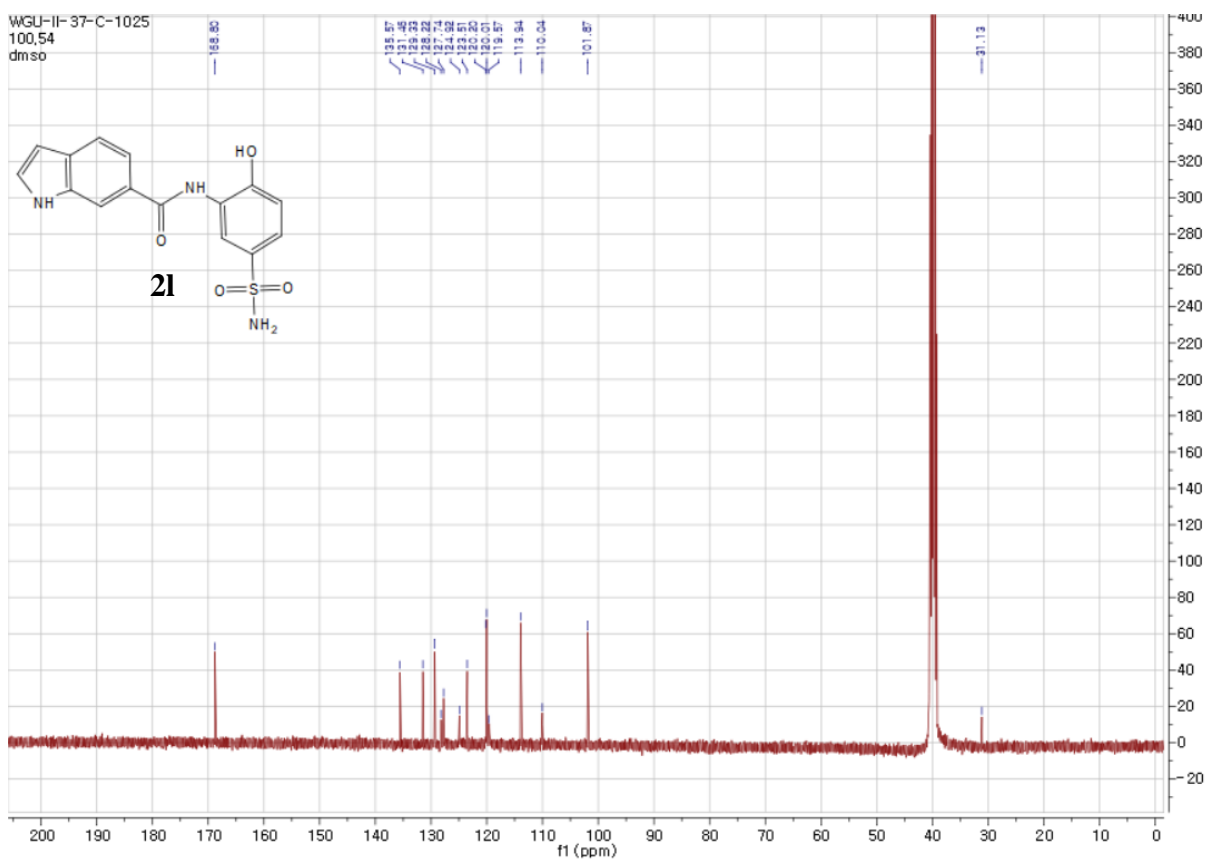

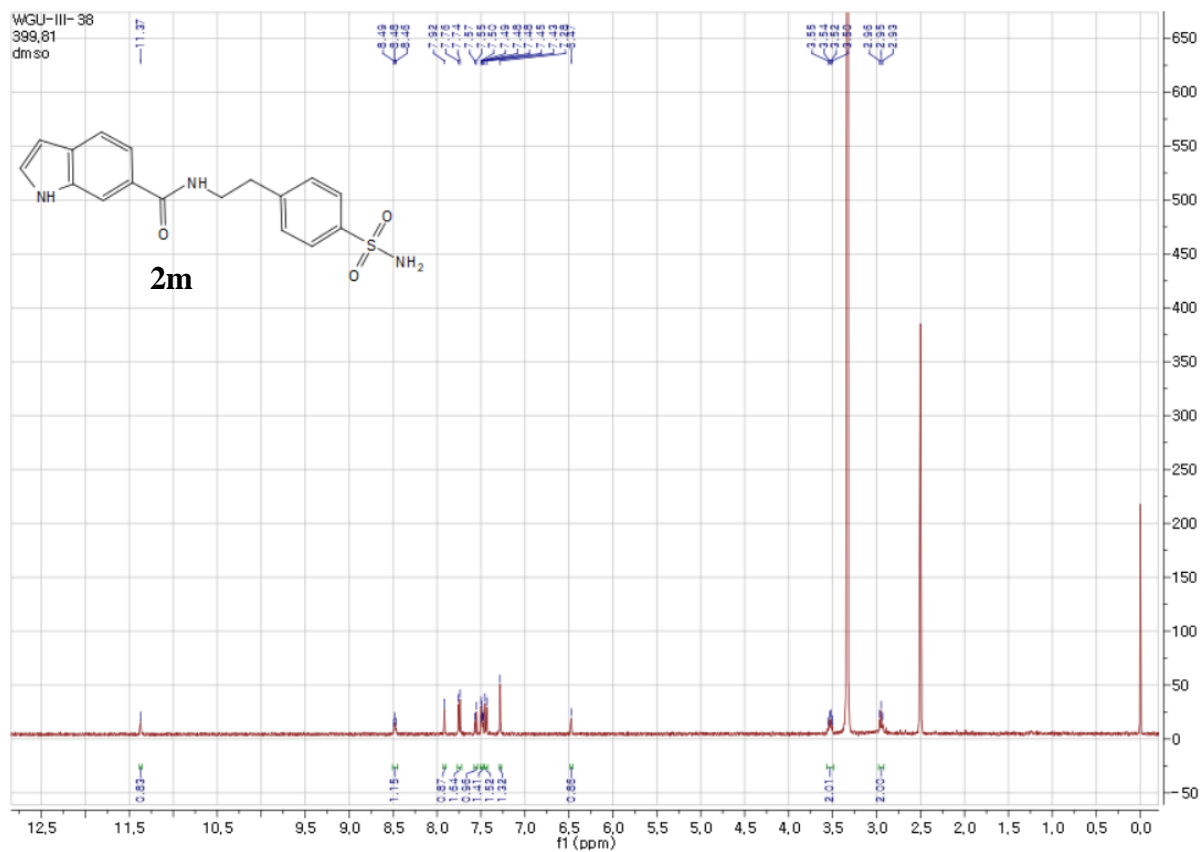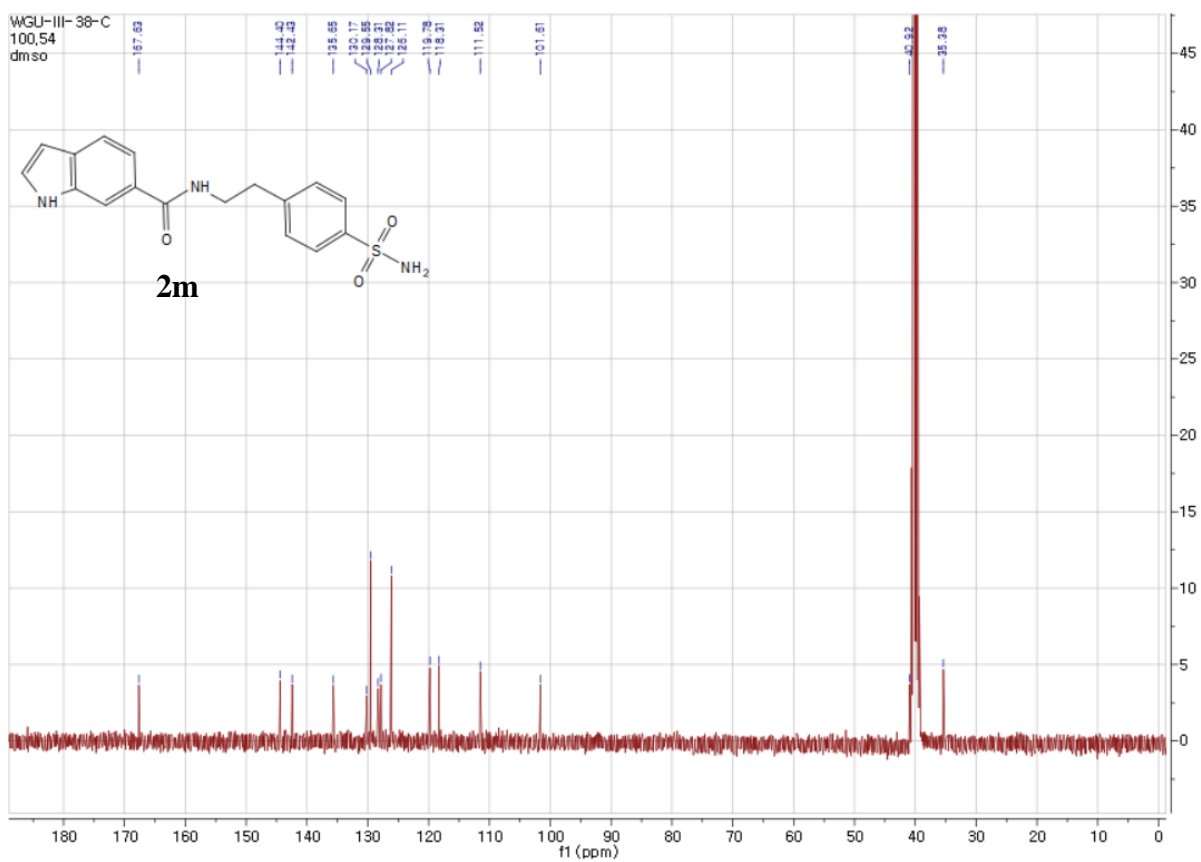

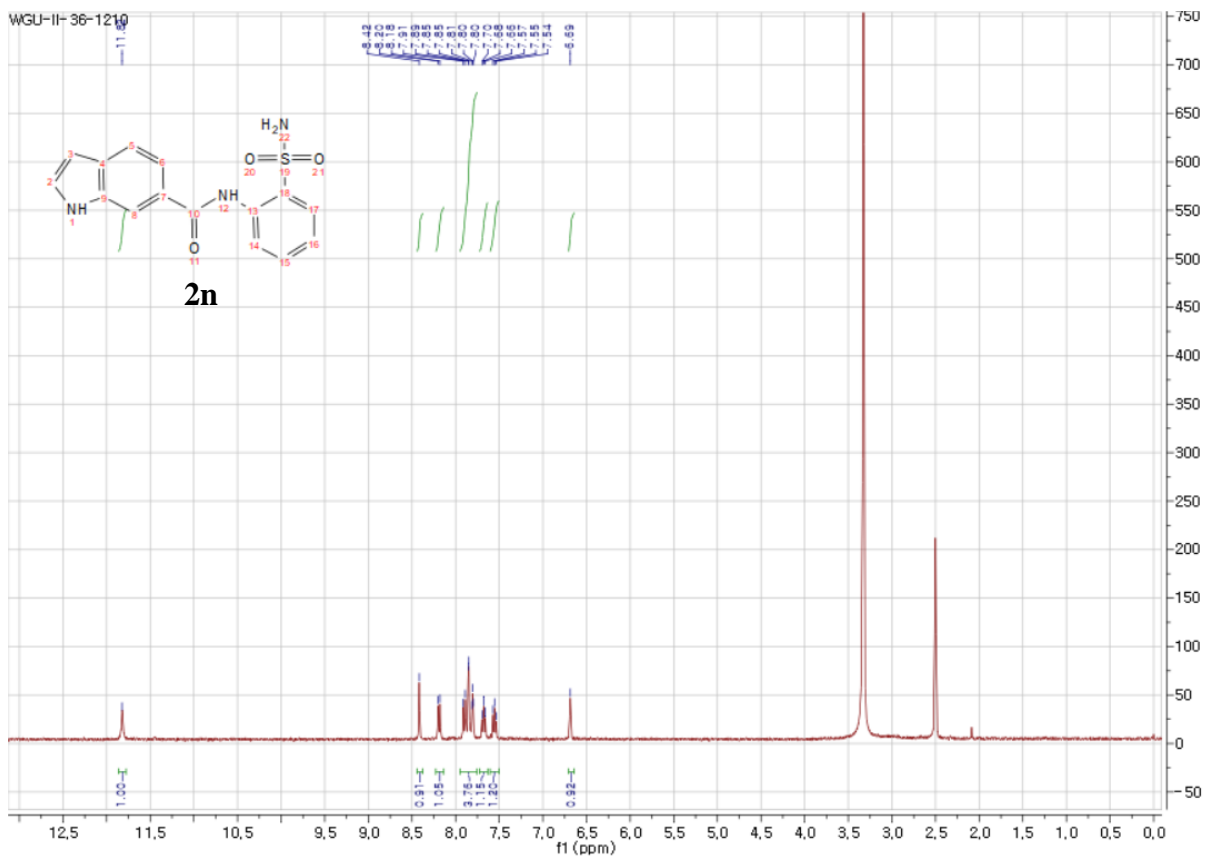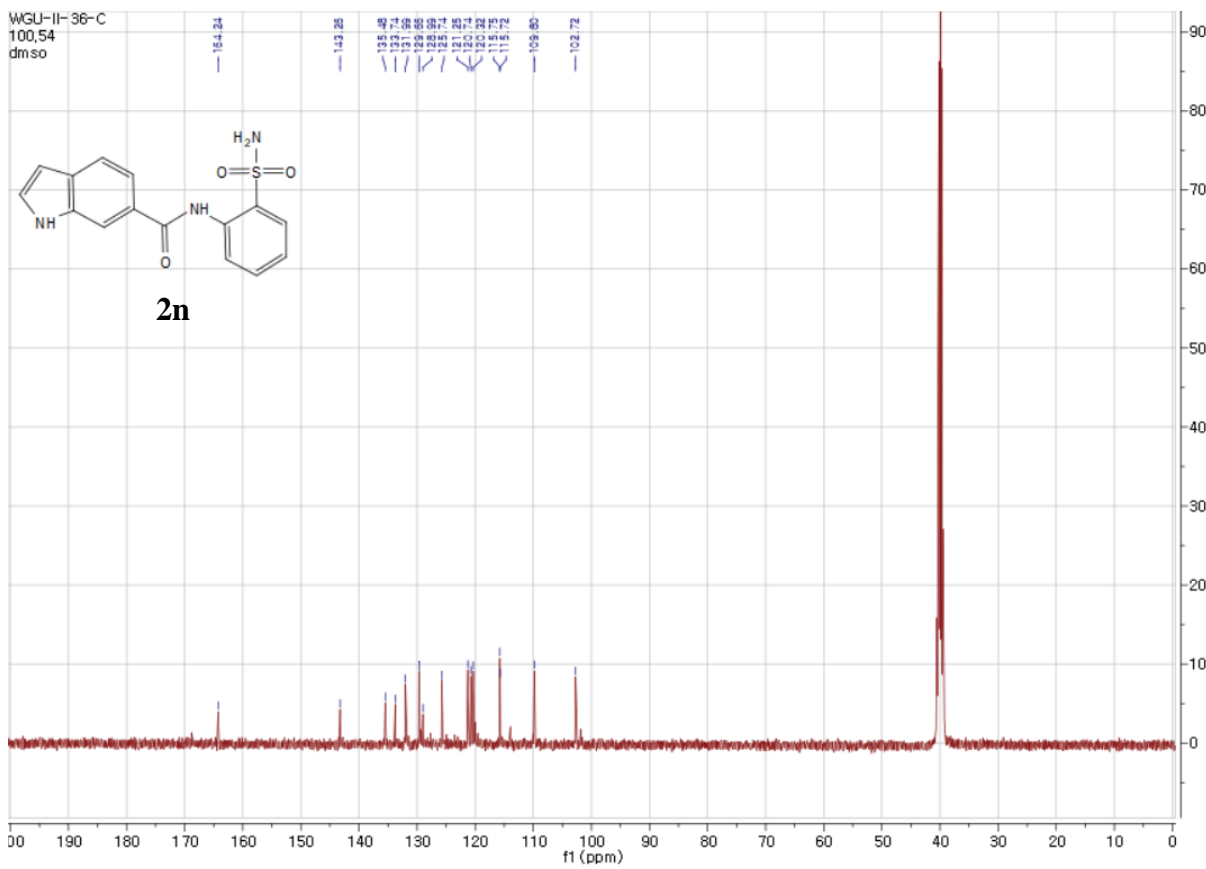





## 2. HPLC purity

|   | Name | Retention Time (min) | Purity1 Angle | Purity1 Threshold | PDA Match1 Spect. Name | PDA Match1 Angle | PDA Match1 Threshold | PDA Match1 Lib. Name | Area (μV*sec) | % Area | Height (μV) | Int Type | Amount |
|---|------|----------------------|---------------|-------------------|------------------------|------------------|----------------------|----------------------|---------------|--------|-------------|----------|--------|
| 1 |      | 5.853                |               |                   |                        |                  |                      |                      | 21570         | 0.21   | 4841        | bb       |        |
| 2 |      | 9.704                |               |                   |                        |                  |                      |                      | 10154012      | 99.79  | 1640978     | bb       |        |

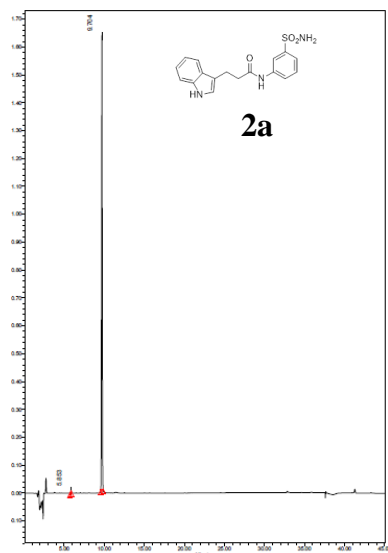

|    | Name | Retention Time (min) | Purity1 Angle | Purity1 Threshold | PDA Match1 Spect. Name | PDA Match1 Angle | PDA Match1 Threshold | PDA Match1 Lib. Name | Area (μV*sec) | % Area | Height (μV) | Int Type | Amount |
|----|------|----------------------|---------------|-------------------|------------------------|------------------|----------------------|----------------------|---------------|--------|-------------|----------|--------|
| 1  |      | 3.160                |               |                   |                        |                  |                      |                      | 35909         | 0.23   | 2232        | bb       |        |
| 2  |      | 4.933                |               |                   |                        |                  |                      |                      | 48324         | 0.30   | 4938        | bb       |        |
| 3  |      | 6.038                |               |                   |                        |                  |                      |                      | 18831         | 0.12   | 2398        | bb       |        |
| 4  |      | 6.700                |               |                   |                        |                  |                      |                      | 1569          | 0.01   | 423         | bb       |        |
| 5  |      | 7.249                |               |                   |                        |                  |                      |                      | 7081          | 0.04   | 1689        | bb       |        |
| 6  |      | 8.238                |               |                   |                        |                  |                      |                      | 44044         | 0.28   | 8594        | bb       |        |
| 7  |      | 8.659                |               |                   |                        |                  |                      |                      | 15369532      | 97.00  | 2242742     | bb       |        |
| 8  |      | 10.077               |               |                   |                        |                  |                      |                      | 2482          | 0.02   | 311         | bb       |        |
| 9  |      | 11.383               |               |                   |                        |                  |                      |                      | 40538         | 0.26   | 5556        | bb       |        |
| 10 |      | 12.766               |               |                   |                        |                  |                      |                      | 17021         | 0.11   | 4020        | bb       |        |
| 11 |      | 13.641               |               |                   |                        |                  |                      |                      | 1431          | 0.01   | 382         | bb       |        |
| 12 |      | 15.298               |               |                   |                        |                  |                      |                      | 257785        | 1.63   | 15769       | bb       |        |

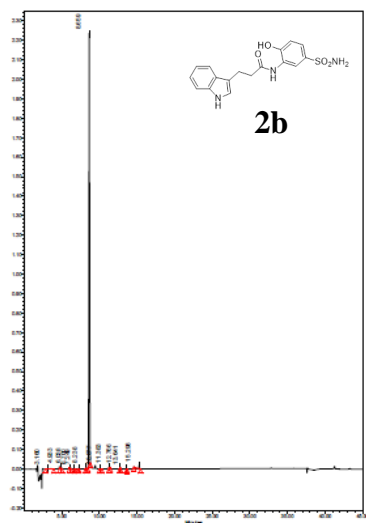

| Name | Retention Time (min) | Purity1 Angle | Purity1 Threshold | PDA Match1 Spect. Name | PDA Match1 Angle | PDA Match1 Threshold | PDA Match1 Lib. Name | Area (μV*sec) | % Area | Height (μV) | Int Type | Amount | Units |
|------|----------------------|---------------|-------------------|------------------------|------------------|----------------------|----------------------|---------------|--------|-------------|----------|--------|-------|
| 1    | 12.265               |               |                   |                        |                  |                      |                      | 909           | 0.06   | 253         | bb       |        |       |
| 2    | 13.882               |               |                   |                        |                  |                      |                      | 1591817       | 99.00  | 286374      | bb       |        |       |
| 3    | 14.943               |               |                   |                        |                  |                      |                      | 525           | 0.03   | 199         | bb       |        |       |
| 4    | 15.868               |               |                   |                        |                  |                      |                      | 0             | 0.00   | -0          | bb       |        |       |
| 5    | 16.350               |               |                   |                        |                  |                      |                      | 376           | 0.02   | 87          | bb       |        |       |
| 6    | 17.441               |               |                   |                        |                  |                      |                      | 628           | 0.04   | 145         | bb       |        |       |
| 7    | 18.177               |               |                   |                        |                  |                      |                      | 880           | 0.05   | -125        | bb       |        |       |
| 8    | 18.965               |               |                   |                        |                  |                      |                      | 6813          | 0.42   | 563         | bb       |        |       |
| 9    | 20.030               |               |                   |                        |                  |                      |                      | 5964          | 0.37   | 1217        | bb       |        |       |

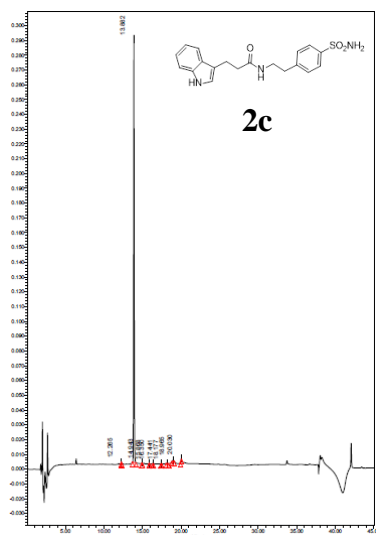

| Name | Retention Time (min) | Purity1 Angle | Purity1 Threshold | PDA Match1 Spect. Name | PDA Match1 Angle | PDA Match1 Threshold | PDA Match1 Lib. Name | Area (μV*sec) | % Area | Height (μV) | Int Type | Amount |
|------|----------------------|---------------|-------------------|------------------------|------------------|----------------------|----------------------|---------------|--------|-------------|----------|--------|
| 1    | 9.741                |               |                   |                        |                  |                      |                      | 16354019      | 99.98  | 2322914     | bb       |        |
| 2    | 12.437               |               |                   |                        |                  |                      |                      | 2751          | 0.02   | 812         | bb       |        |

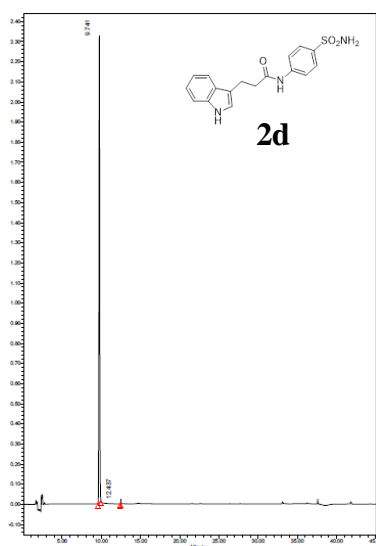

|   | Name | Retention Time (min) | Purity1 Angle | Purity1 Threshold | PDA Match1 Spect. Name | PDA Match1 Angle | PDA Match1 Threshold | PDA Match1 Lib. Name | Area (μV*sec) | % Area | Height (μV) | Int Type | Amount |
|---|------|----------------------|---------------|-------------------|------------------------|------------------|----------------------|----------------------|---------------|--------|-------------|----------|--------|
| 1 |      | 12.045               |               |                   |                        |                  |                      |                      | 13607         | 0.06   | 2636        | bb       |        |
| 2 |      | 15.123               |               |                   |                        |                  |                      |                      | 23033597      | 96.78  | 2409116     | bb       |        |
| 3 |      | 20.434               |               |                   |                        |                  |                      |                      | 752736        | 3.16   | 120461      | bb       |        |

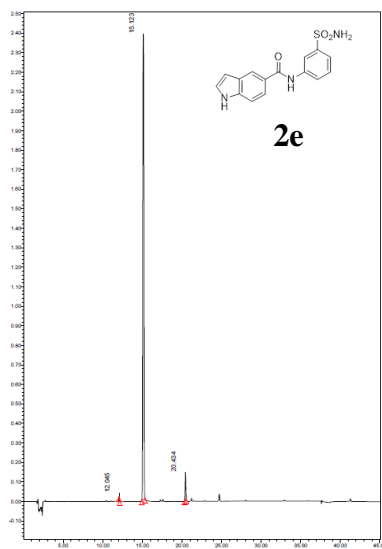

|   | Name | Retention Time (min) | Purity1 Angle | Purity1 Threshold | PDA Match1 Spect. Name | PDA Match1 Angle | PDA Match1 Threshold | PDA Match1 Lib. Name | Area (μV*sec) | % Area | Height (μV) | Int Type | Amount |
|---|------|----------------------|---------------|-------------------|------------------------|------------------|----------------------|----------------------|---------------|--------|-------------|----------|--------|
| 1 |      | 15.051               |               |                   |                        |                  |                      |                      | 26567282      | 100.00 | 2436018     | bb       |        |

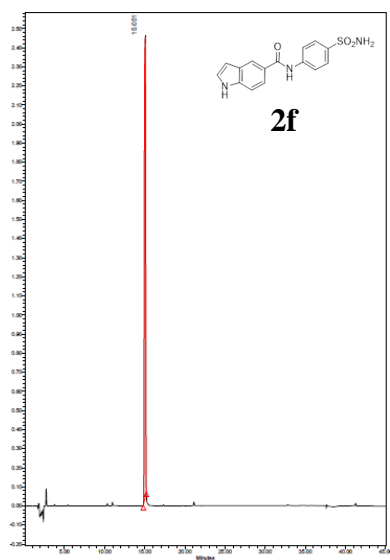

| Name | Retention Time (min) | Purity1 Angle | Purity1 Threshold | PDA Match1 Spect. Name | PDA Match1 Angle | PDA Match1 Threshold | PDA Match1 Lib. Name | Area (μV*sec) | % Area | Height (μV) | Int Type | Amount |
|------|----------------------|---------------|-------------------|------------------------|------------------|----------------------|----------------------|---------------|--------|-------------|----------|--------|
| 1    | 11.039               |               |                   |                        |                  |                      |                      | 40642         | 0.21   | 7378        | bb       |        |
| 2    | 15.087               |               |                   |                        |                  |                      |                      | 19368165      | 99.62  | 2407029     | bb       |        |
| 3    | 21.195               |               |                   |                        |                  |                      |                      | 33647         | 0.17   | 5326        | bb       |        |

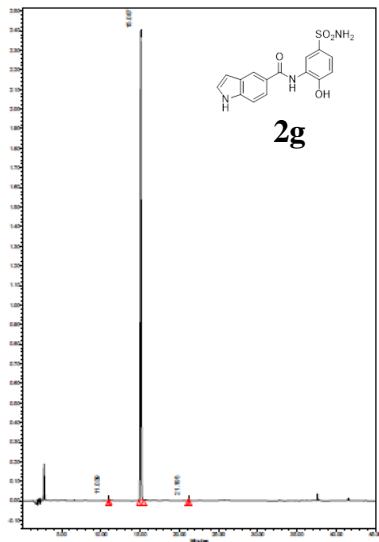

| Name | Retention Time (min) | Purity1 Angle | Purity1 Threshold | PDA Match1 Spect. Name | PDA Match1 Angle | PDA Match1 Threshold | PDA Match1 Lib. Name | Area (μV*sec) | % Area | Height (μV) | Int Type | Amount |
|------|----------------------|---------------|-------------------|------------------------|------------------|----------------------|----------------------|---------------|--------|-------------|----------|--------|
| 1    | 5.124                |               |                   |                        |                  |                      |                      | 14862         | 0.10   | 3240        | bb       |        |
| 2    | 5.406                |               |                   |                        |                  |                      |                      | 224896        | 1.56   | 39342       | bb       |        |
| 3    | 6.140                |               |                   |                        |                  |                      |                      | 14058338      | 97.68  | 2113810     | bb       |        |
| 4    | 9.788                |               |                   |                        |                  |                      |                      | 22932         | 0.16   | 6528        | bb       |        |
| 5    | 12.337               |               |                   |                        |                  |                      |                      | 70658         | 0.49   | 17520       | bb       |        |

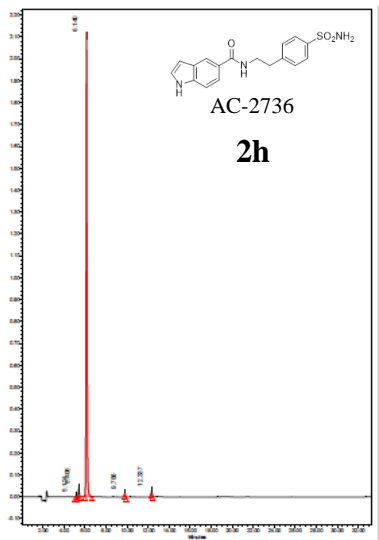

|   | Name | Retention Time (min) | Purity1 Angle | Purity1 Threshold | PDA Match1 Spect. Name | PDA Match1 Angle | PDA Match1 Threshold | PDA Match1 Lib. Name | Area (μV*sec) | % Area | Height (μV) | Int Type | Amount |
|---|------|----------------------|---------------|-------------------|------------------------|------------------|----------------------|----------------------|---------------|--------|-------------|----------|--------|
| 1 |      | 9.104                |               |                   |                        |                  |                      |                      | 54155         | 0.66   | 12032       | bb       |        |
| 2 |      | 9.748                |               |                   |                        |                  |                      |                      | 764           | 0.01   | 240         | bb       |        |
| 3 |      | 11.355               |               |                   |                        |                  |                      |                      | 52092         | 0.64   | 10110       | bb       |        |
| 4 |      | 11.797               |               |                   |                        |                  |                      |                      | 1827          | 0.02   | 501         | bb       |        |
| 5 |      | 12.212               |               |                   |                        |                  |                      |                      | 13261         | 0.16   | 2847        | bb       |        |
| 6 |      | 12.748               |               |                   |                        |                  |                      |                      | 61            | 0.00   | 61          | bb       |        |
| 7 |      | 13.714               |               |                   |                        |                  |                      |                      | 1949          | 0.02   | 617         | bb       |        |
| 8 |      | 15.972               |               |                   |                        |                  |                      |                      | 8014764       | 98.02  | 1163330     | bb       |        |
| 9 |      | 16.641               |               |                   |                        |                  |                      |                      | 37974         | 0.46   | 4672        | bb       |        |

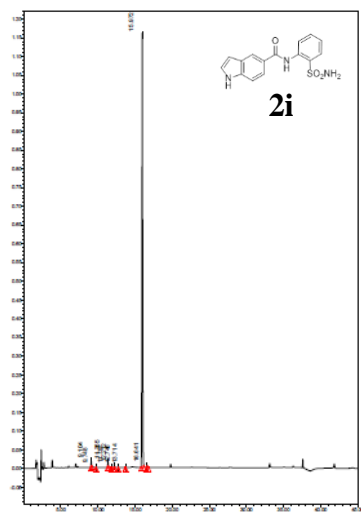

|   | Name | Retention Time (min) | Purity1 Angle | Purity1 Threshold | PDA Match1 Spect. Name | PDA Match1 Angle | PDA Match1 Threshold | PDA Match1 Lib. Name | Area (μV*sec) | % Area | Height (μV) | Int Type | Amount |
|---|------|----------------------|---------------|-------------------|------------------------|------------------|----------------------|----------------------|---------------|--------|-------------|----------|--------|
| 1 |      | 11.070               |               |                   |                        |                  |                      |                      | 29879         | 0.15   | 4607        | bb       |        |
| 2 |      | 12.015               |               |                   |                        |                  |                      |                      | 25660         | 0.13   | 4915        | bb       |        |
| 3 |      | 15.723               |               |                   |                        |                  |                      |                      | 20068158      | 99.67  | 2419202     | bb       |        |
| 4 |      | 19.557               |               |                   |                        |                  |                      |                      | 10109         | 0.05   | 1649        | bb       |        |

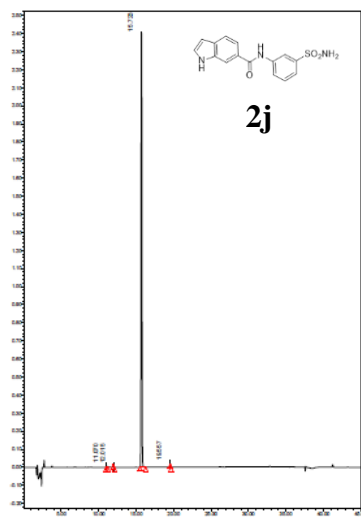

|   | Name | Retention Time (min) | Purity1 Angle | Purity1 Threshold | PDA Match1 Spect. Name | PDA Match1 Angle | PDA Match1 Threshold | PDA Match1 Lib. Name | Area (μV*sec) | % Area | Height (μV) | Int Type | Amount |
|---|------|----------------------|---------------|-------------------|------------------------|------------------|----------------------|----------------------|---------------|--------|-------------|----------|--------|
| 1 |      | 12.191               |               |                   |                        |                  |                      |                      | 1763          | 0.02   | 705         | bb       |        |
| 2 |      | 12.434               |               |                   |                        |                  |                      |                      | 6031          | 0.08   | 1412        | bb       |        |
| 3 |      | 15.953               |               |                   |                        |                  |                      |                      | 7503939       | 99.90  | 1092658     | bb       |        |

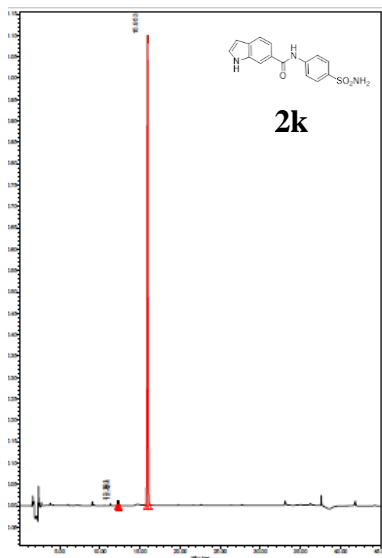

|    | Name | Retention Time (min) | Purity1 Angle | Purity1 Threshold | PDA Match1 Spect. Name | PDA Match1 Angle | PDA Match1 Threshold | PDA Match1 Lib. Name | Area (μV*sec) | % Area | Height (μV) | Int Type | Amount |
|----|------|----------------------|---------------|-------------------|------------------------|------------------|----------------------|----------------------|---------------|--------|-------------|----------|--------|
| 1  |      | 6.041                |               |                   |                        |                  |                      |                      | 11743         | 0.18   | 2638        | bb       |        |
| 2  |      | 6.995                |               |                   |                        |                  |                      |                      | 3264          | 0.05   | 681         | bb       |        |
| 3  |      | 7.281                |               |                   |                        |                  |                      |                      | 8370          | 0.13   | 1922        | bb       |        |
| 4  |      | 7.773                |               |                   |                        |                  |                      |                      | 11908         | 0.19   | 1654        | bb       |        |
| 5  |      | 9.094                |               |                   |                        |                  |                      |                      | 50125         | 0.78   | 10364       | bb       |        |
| 6  |      | 9.709                |               |                   |                        |                  |                      |                      | 7152          | 0.11   | 1110        | bb       |        |
| 7  |      | 11.344               |               |                   |                        |                  |                      |                      | 14838         | 0.23   | 2412        | bb       |        |
| 8  |      | 12.201               |               |                   |                        |                  |                      |                      | 2902          | 0.05   | 849         | bb       |        |
| 9  |      | 13.144               |               |                   |                        |                  |                      |                      | 7235          | 0.11   | -585        | bb       |        |
| 10 |      | 13.919               |               |                   |                        |                  |                      |                      | 269           | 0.00   | -56         | bb       |        |
| 11 |      | 15.492               |               |                   |                        |                  |                      |                      | 27            | 0.00   | -14         | bb       |        |
| 12 |      | 15.608               |               |                   |                        |                  |                      |                      | 0             | 0.00   | 0           | bb       |        |
| 13 |      | 15.963               |               |                   |                        |                  |                      |                      | 6272192       | 98.03  | 918650      | bb       |        |

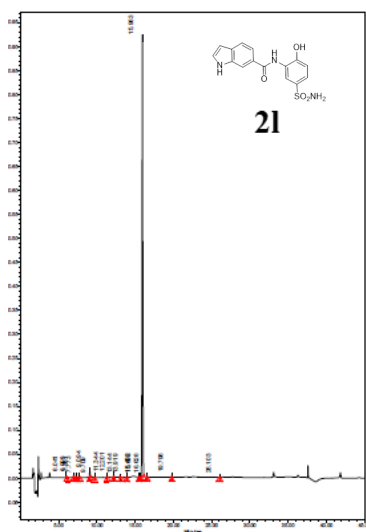

| Name | Retention Time (min) | Purity1 Angle | Purity1 Threshold | PDA Match1 Spect. Name | PDA Match1 Angle | PDA Match1 Threshold | PDA Match1 Lib. Name | Area (μV*sec) | % Area | Height (μV) | Int Type | Amount | Units |
|------|----------------------|---------------|-------------------|------------------------|------------------|----------------------|----------------------|---------------|--------|-------------|----------|--------|-------|
| 1    | 1.982                |               |                   |                        |                  |                      |                      | 1737170       | 96.73  | 129132      | bb       |        |       |
| 2    | 2.407                |               |                   |                        |                  |                      |                      | 1179          | 0.07   | 597         | bb       |        |       |
| 3    | 2.518                |               |                   |                        |                  |                      |                      | 55830         | 3.11   | 13988       | bb       |        |       |
| 4    | 2.752                |               |                   |                        |                  |                      |                      | 1686          | 0.09   | 558         | bb       |        |       |

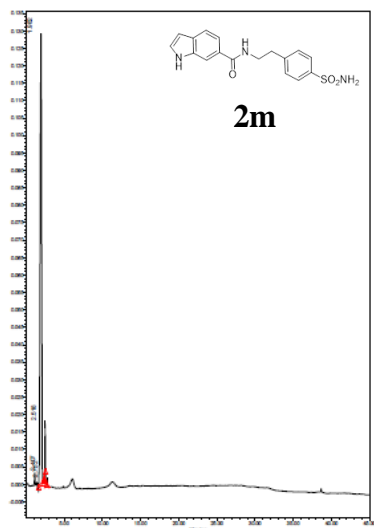

| Name | Retention Time (min) | Purity1 Angle | Purity1 Threshold | PDA Match1 Spect. Name | PDA Match1 Angle | PDA Match1 Threshold | PDA Match1 Lib. Name | Area (μV*sec) | % Area | Height (μV) | Int Type | Amount |
|------|----------------------|---------------|-------------------|------------------------|------------------|----------------------|----------------------|---------------|--------|-------------|----------|--------|
| 1    | 9.092                |               |                   |                        |                  |                      |                      | 76112         | 0.92   | 13853       | bb       |        |
| 2    | 9.338                |               |                   |                        |                  |                      |                      | 307           | 0.00   | 192         | bb       |        |
| 3    | 9.714                |               |                   |                        |                  |                      |                      | 6898          | 0.08   | 1735        | bb       |        |
| 4    | 11.336               |               |                   |                        |                  |                      |                      | 18297         | 0.22   | 3916        | bb       |        |
| 5    | 12.196               |               |                   |                        |                  |                      |                      | 2351          | 0.03   | 702         | bb       |        |
| 6    | 15.238               |               |                   |                        |                  |                      |                      | 34            | 0.00   | 34          | bb       |        |
| 7    | 15.954               |               |                   |                        |                  |                      |                      | 8184772       | 98.70  | 1190180     | bb       |        |
| 8    | 16.619               |               |                   |                        |                  |                      |                      | 4039          | 0.05   | 793         | bb       |        |

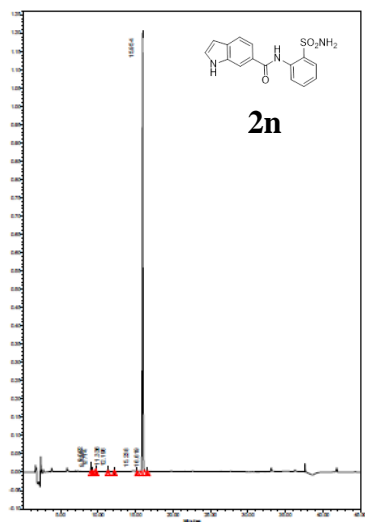

|   | Name | Retention Time (min) | Purity1 Angle | Purity1 Threshold | PDA Match1 Spect. Name | PDA Match1 Angle | PDA Match1 Threshold | PDA Match1 Lib. Name | Area (μV*sec) | % Area | Height (μV) | Int Type | Amount |
|---|------|----------------------|---------------|-------------------|------------------------|------------------|----------------------|----------------------|---------------|--------|-------------|----------|--------|
| 1 |      | 6.655                |               |                   |                        |                  |                      |                      | 16039540      | 97.38  | 2313113     | bb       |        |
| 2 |      | 7.778                |               |                   |                        |                  |                      |                      | 9441          | 0.06   | 1850        | bb       |        |
| 3 |      | 8.891                |               |                   |                        |                  |                      |                      | 6264          | 0.04   | -1087       | bb       |        |
| 4 |      | 9.898                |               |                   |                        |                  |                      |                      | 415866        | 2.52   | 66089       | bb       |        |

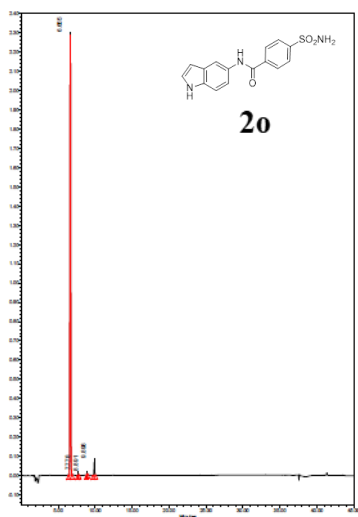



### 3. HRMS data

WGU-I-74 70 (1.287)

1: TOF MS ES+  
4.33e5

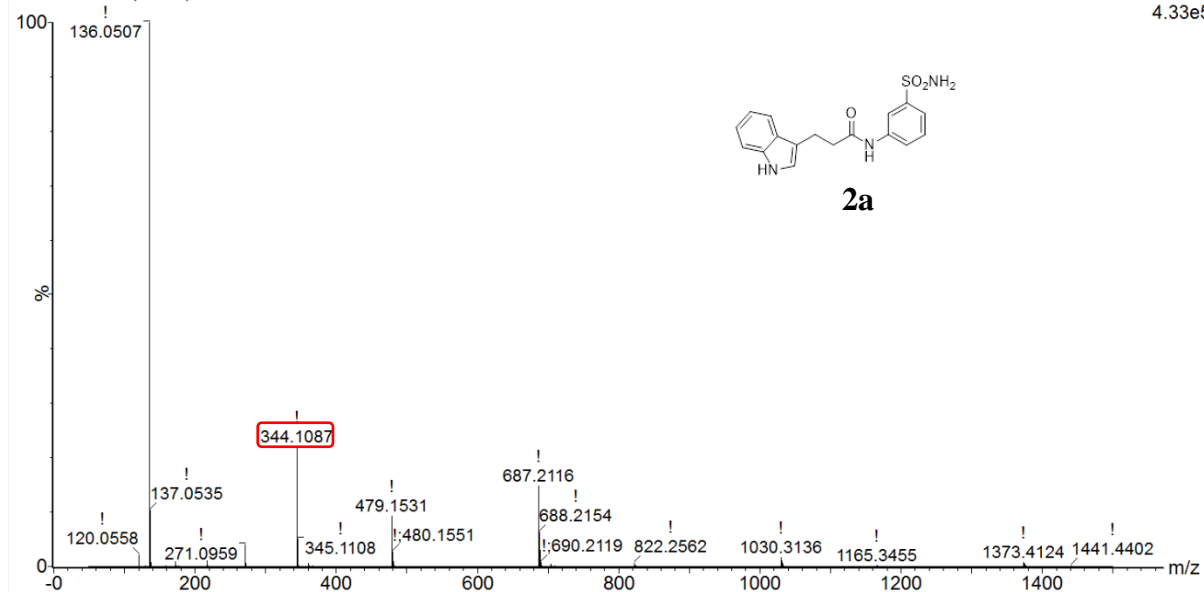

WGU-I-65 73 (1.339)

1: TOF MS ES+  
7.29e4

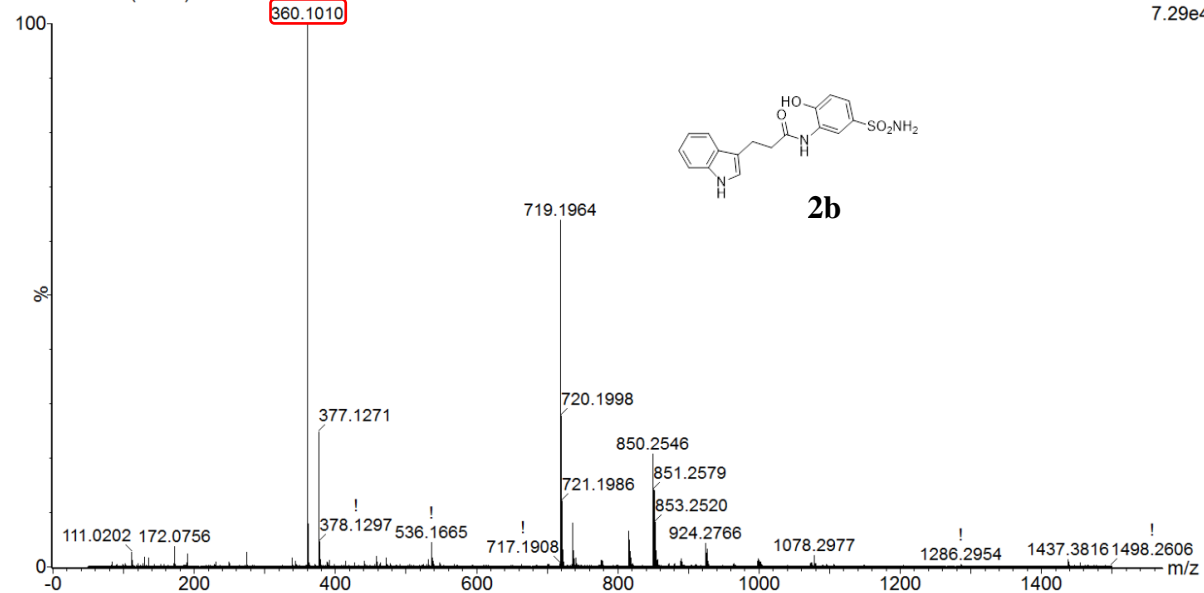

WGU-I-80 66 (1.219)

1: TOF MS ES+  
3.08e5

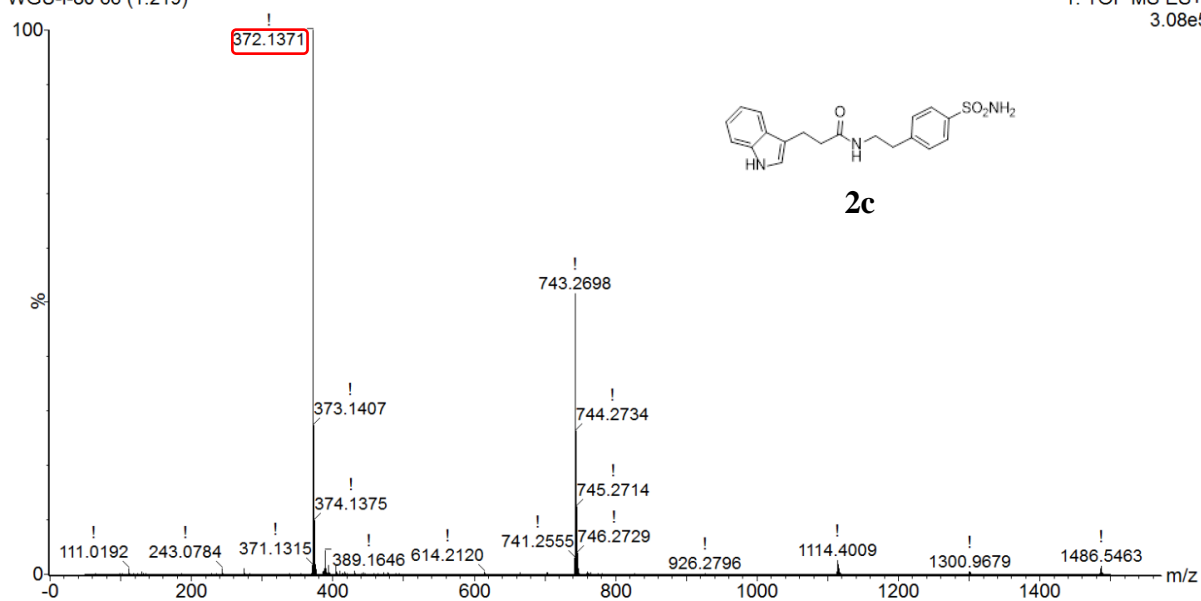

WGU-II-28 78 (1.444)

1: TOF MS ES+  
3.69e4

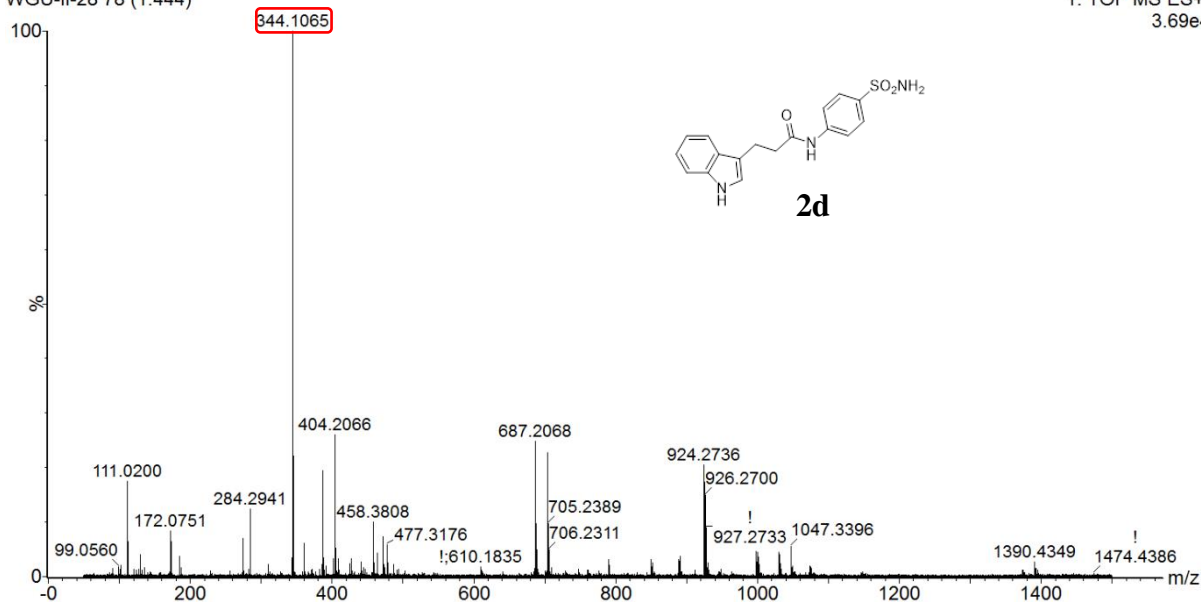

### Compound 2e (Fragmentation)

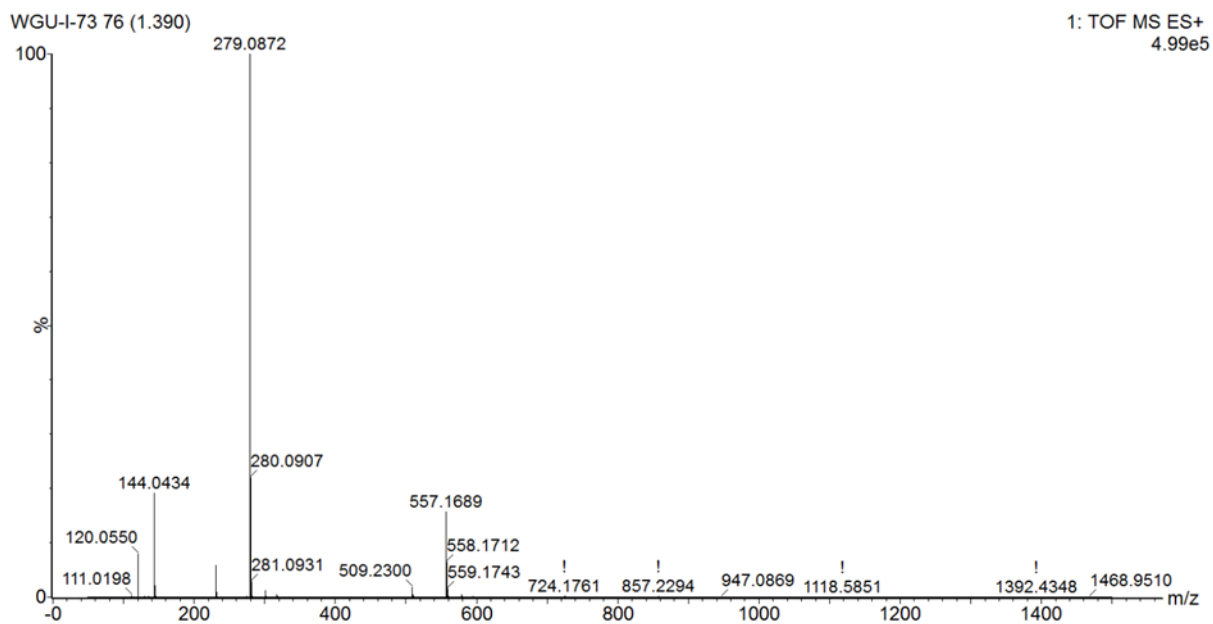

### Compound 2f (Fragmentation)

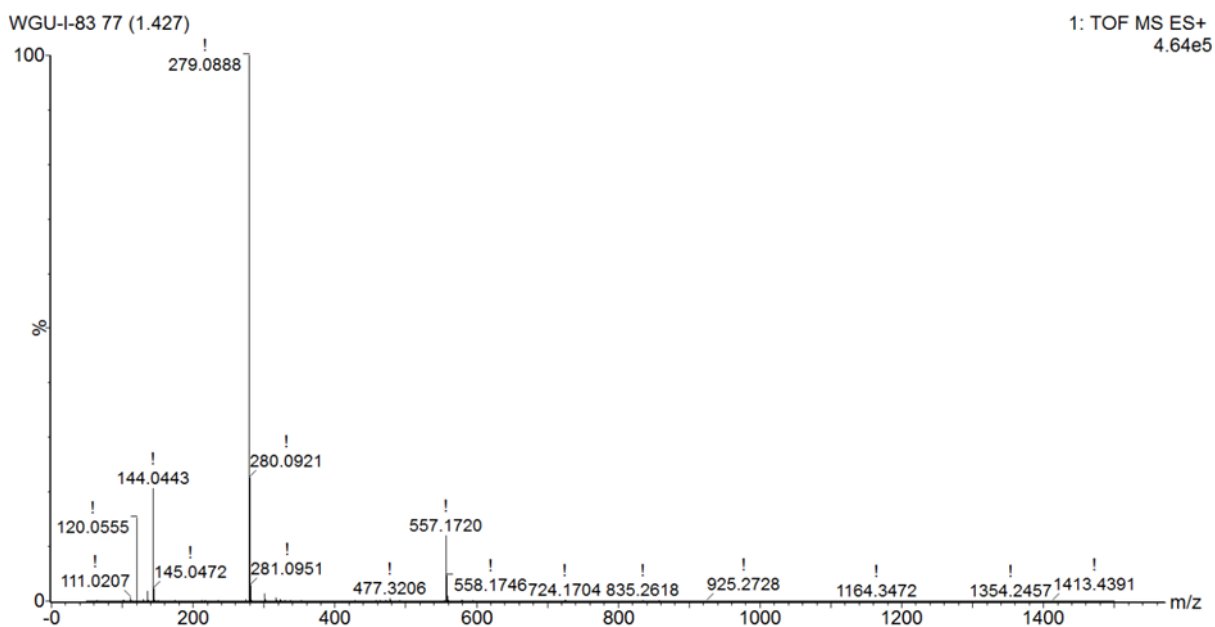

# Compound 2g

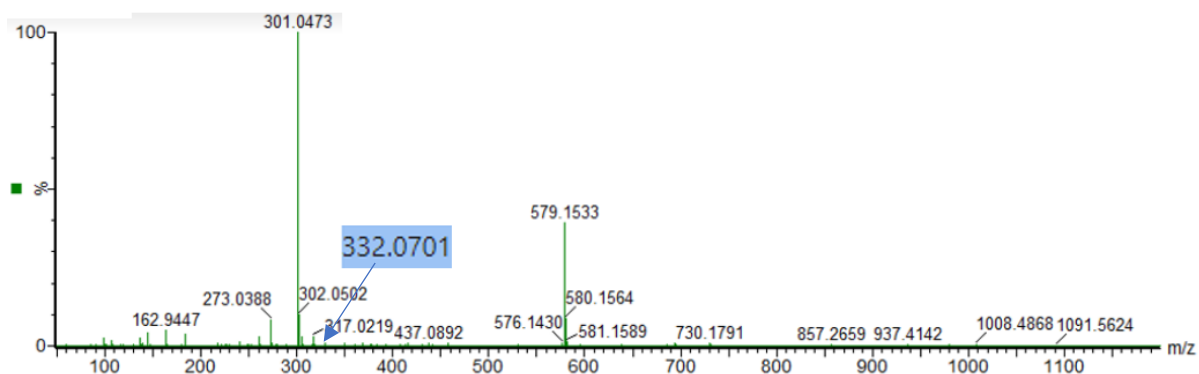

WGU-II-50 65 (1.202)

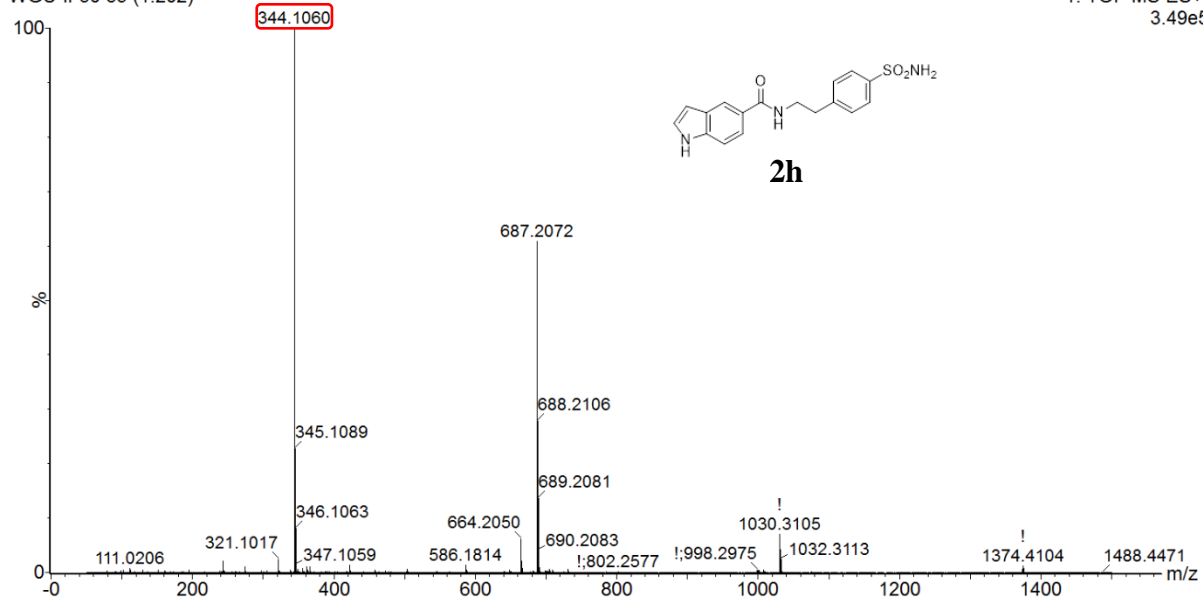

1: TOF MS ES+  
3.49e5

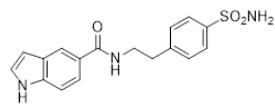

**2h**

WGU-II-37 68 (1.253)

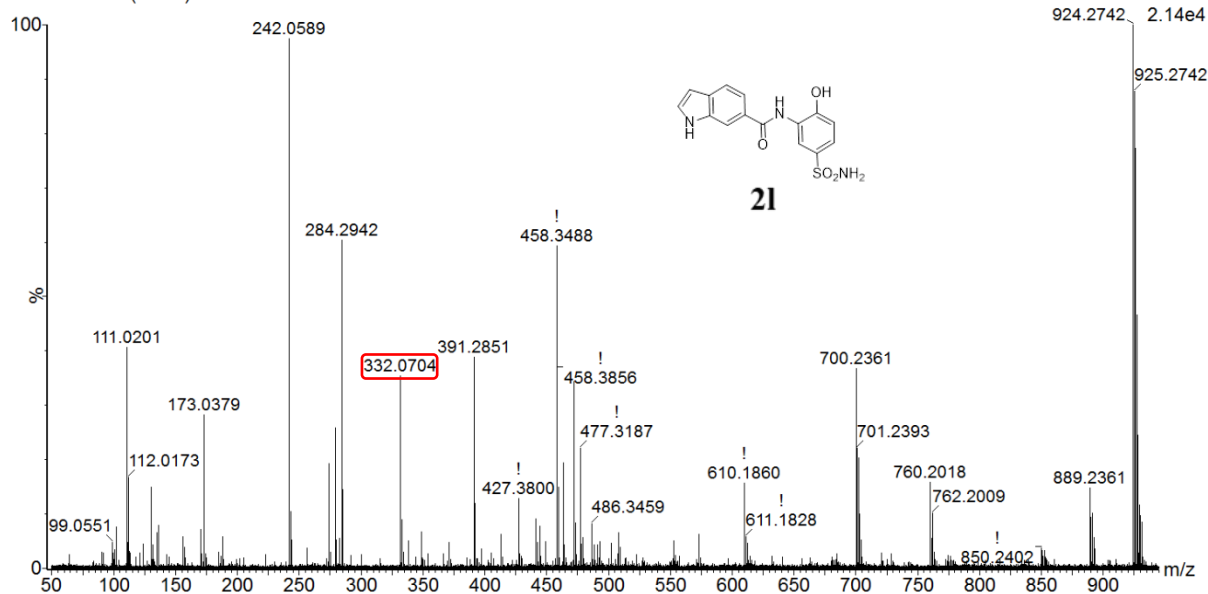

WGU-III-38 76 (1.344)

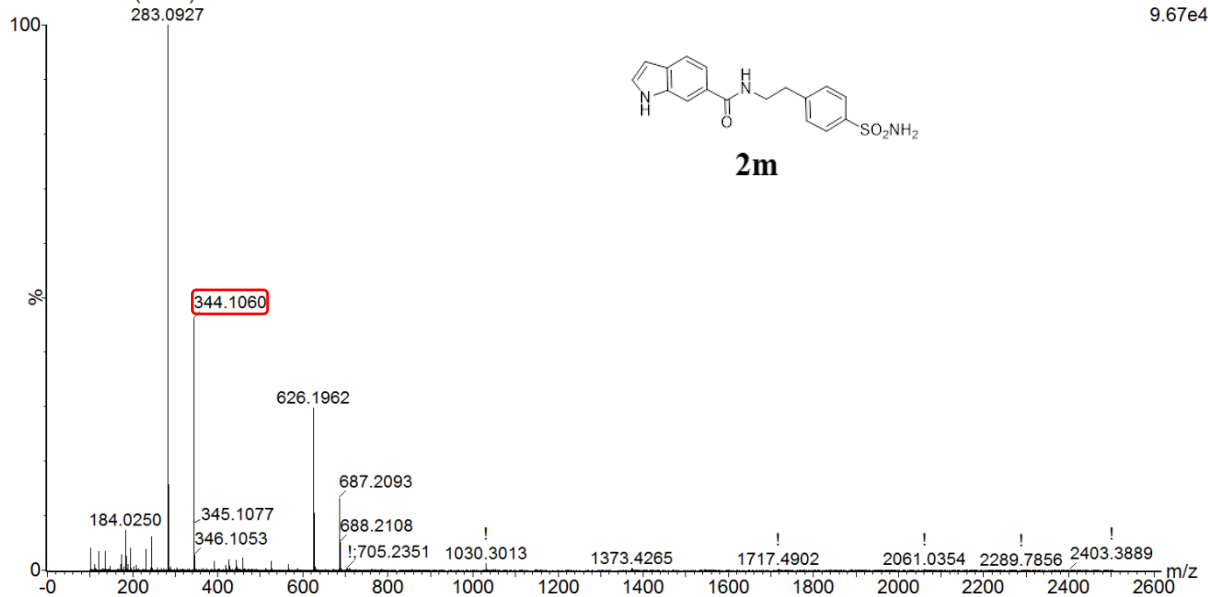

WGU-II-48 67 (1.236)

1: TOF MS ES+  
1.92e5

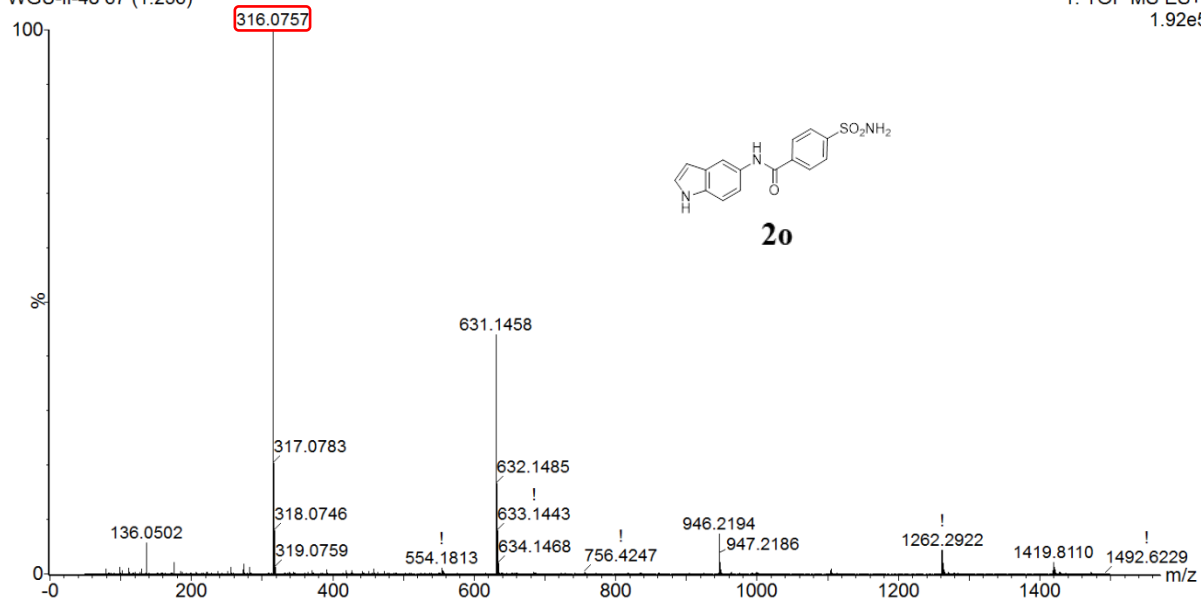

#### 4. Interpretation of HRMS:

##### Compound 2c:

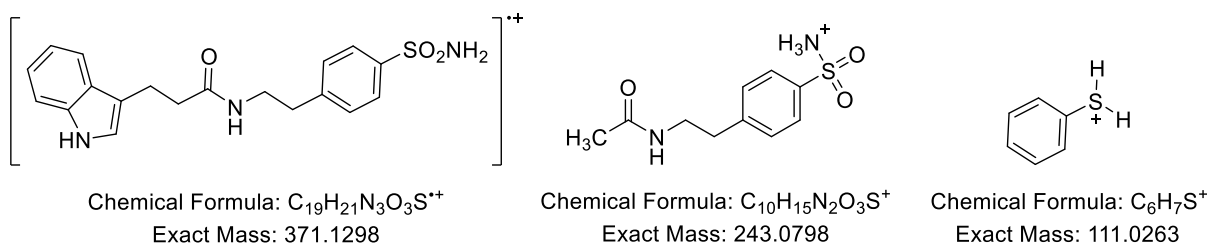

##### Compound 2d:

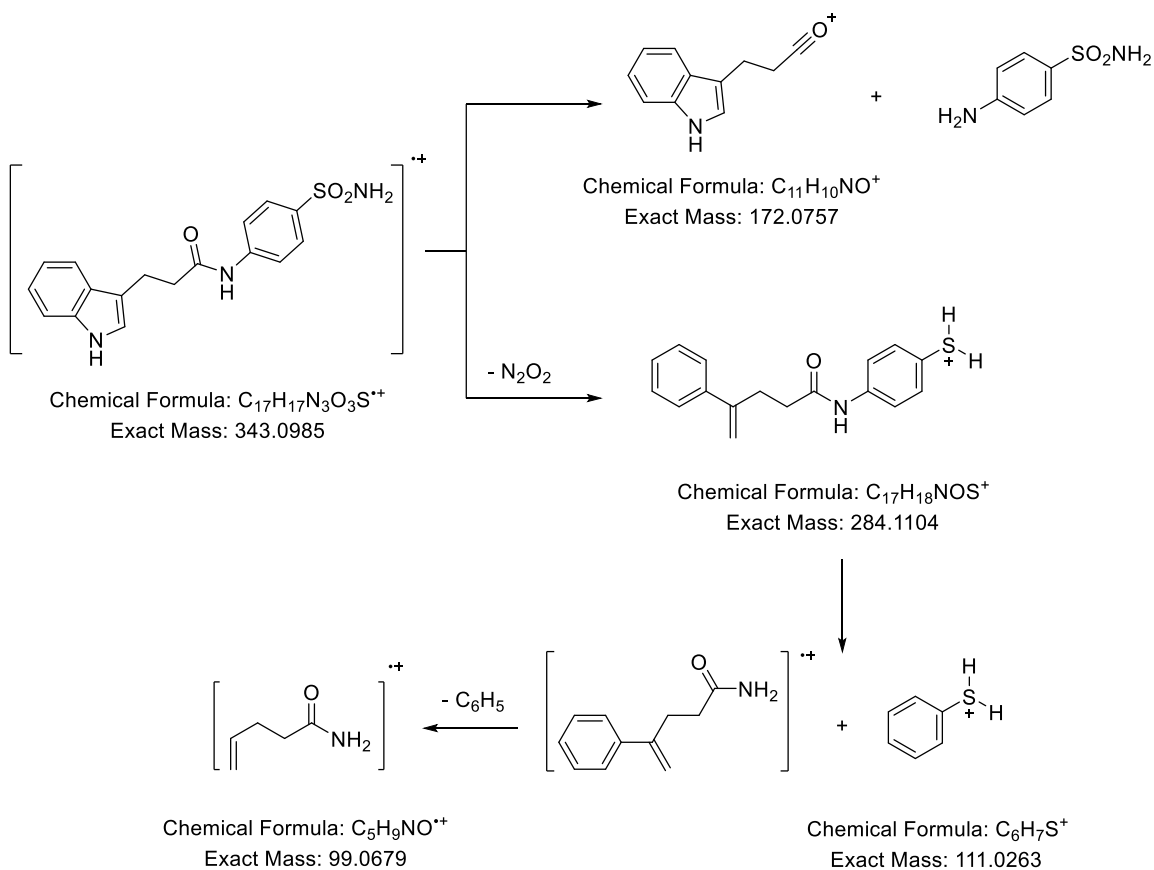

##### Compounds 2e and 2f:

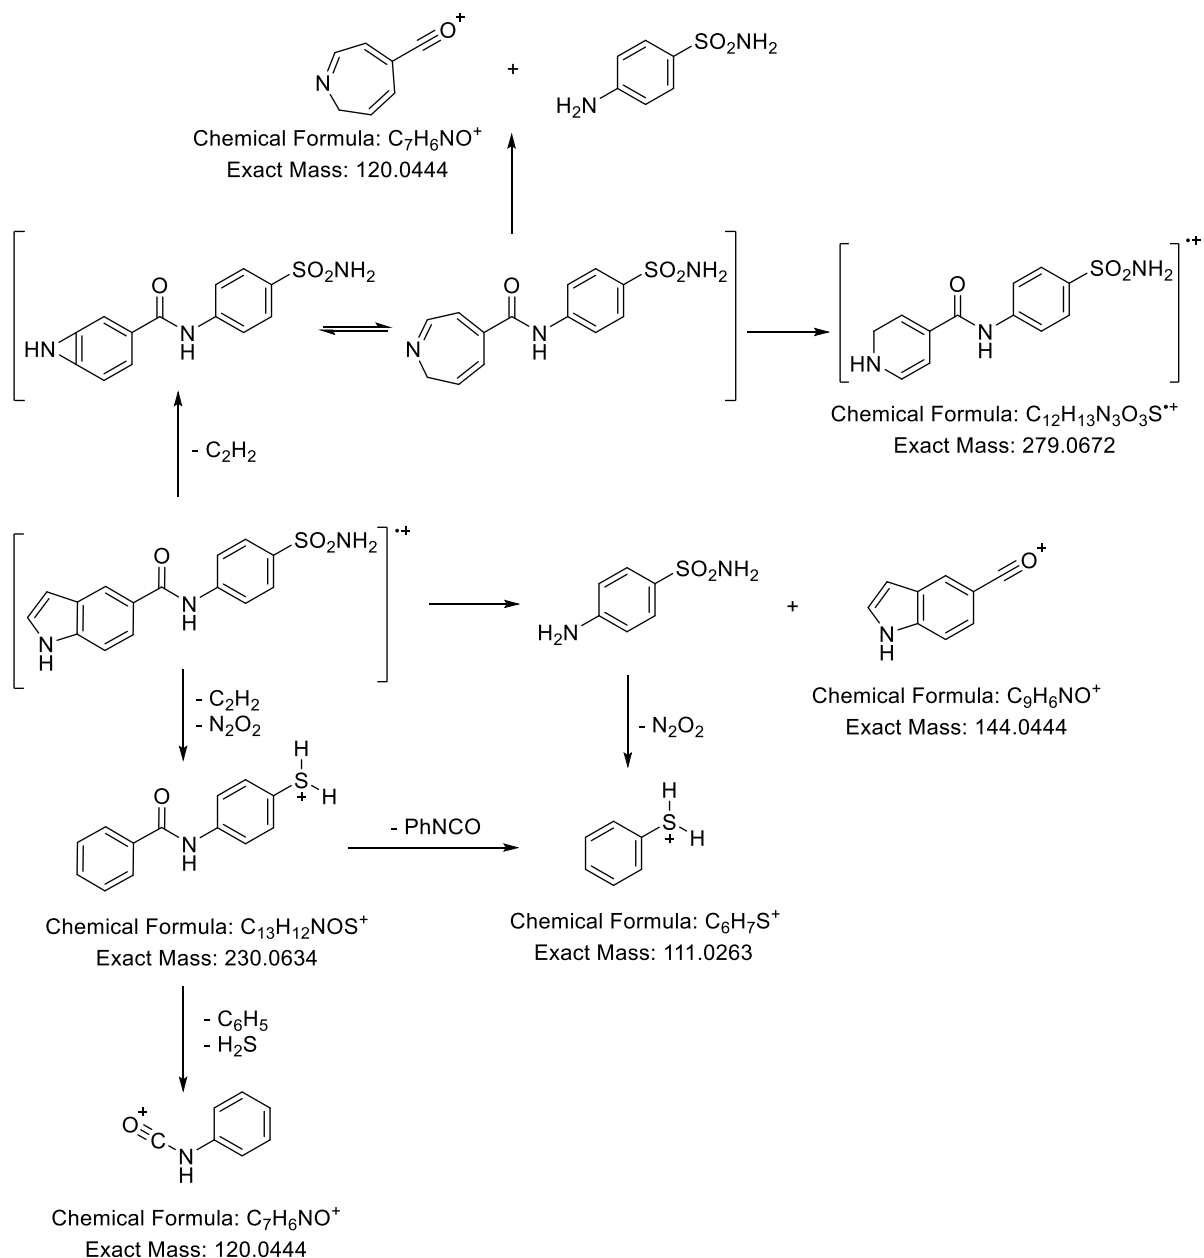

### Compound 2h:

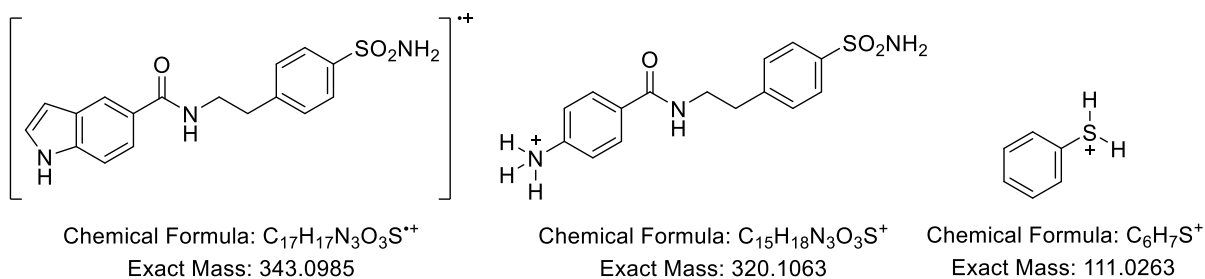

Supplement: s1 [file s1]
